# Supplementary material for: Mapping of Language-and-Memory Networks in Patients With Temporal Lobe Epilepsy by Using the GE2REC Protocol
Source: PubMed Central journal article supplement (PMC8772037; doi:10.3389/fnhum.2021.752138), 2022-01-06
Supplement: Data_Sheet_1.pdf [file Data_Sheet_1.pdf]

**Table S1.** Behavioural performance and differences between LTLE and HC during recognition task

|                   |          | Old items |       |       |       | New items |       |       |      | All items |       |       |         |
|-------------------|----------|-----------|-------|-------|-------|-----------|-------|-------|------|-----------|-------|-------|---------|
|                   |          | %CR       | %ER   | %NR   | RT    | %CR       | %ER   | %NR   | RT   | %CR       | %ER   | %NR   | RT      |
| <b>Mean</b>       | LTLE     | 72.4      | 21    | 6.67  | 1.08  | 75.6      | 13.8  | 10.7  | 1.18 | 74        | 17.4  | 8.68  | 1.13    |
|                   | HC       | 71.2      | 24.9  | 3.82  | 0.97  | 87.5      | 4.61  | 8.03  | 1.12 | 79.3      | 14.7  | 5.91  | 1.05    |
| <b>Median</b>     | LTLE     | 73.8      | 20    | 6.25  | 1.08  | 81.3      | 7.5   | 7.5   | 1.2  | 75        | 16.3  | 8.13  | 1.12    |
|                   | HC       | 72.5      | 25    | 5     | 0.96  | 87.5      | 2.5   | 7.5   | 1.13 | 81.3      | 13.8  | 6.25  | 1.05    |
| <b>SD</b>         | LTLE     | 8.81      | 8.45  | 4.93  | 0.1   | 17.4      | 14.5  | 10.8  | 0.11 | 8.24      | 7.31  | 6.87  | 0.08    |
|                   | HC       | 9.55      | 9.98  | 2.41  | 0.08  | 7.36      | 5.42  | 6.1   | 0.07 | 6.54      | 5.83  | 3.72  | 0.05    |
| <b>Difference</b> | U        | 152       | 126   | 110.5 | 74.5  | 96.5      | 88    | 158.5 | 85.5 | 105       | 118   | 134.5 | 39      |
|                   | <i>p</i> | 0.572     | 0.173 | 0.062 | 0.003 | 0.024     | 0.011 | 0.713 | 0.01 | 0.046     | 0.112 | 0.272 | < 0.001 |

**Abbreviations:** %CR – percentage of correct responses; %ER – percentage of incorrect responses; %NR – Percentage of items without response; RT – reaction time in seconds; LTLE – left temporal lobe epilepsy; HC – healthy controls; The difference in performance between HC and LTLE patients is represented by values of Mann-Whitney *U* tests with the corresponding *p* value.

## Variation of the LMN activation

Healthy controls

A1 Sentence generation

A2 Recognition

A3 Recall

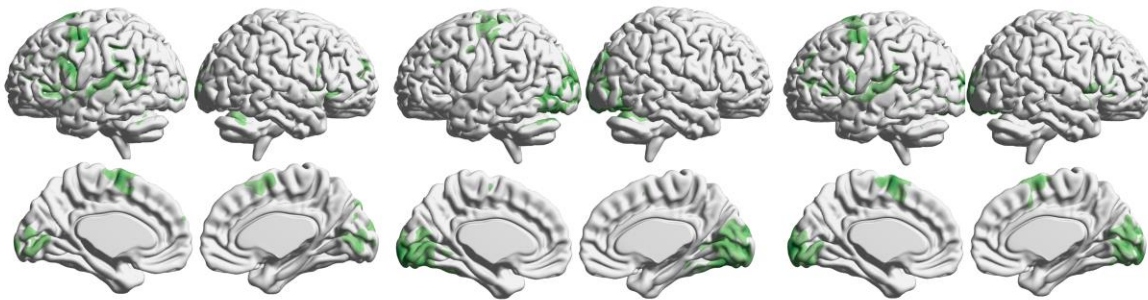

2 4.25

LTLE patients

B1 Sentence generation

B2 Recognition

B3 Recall

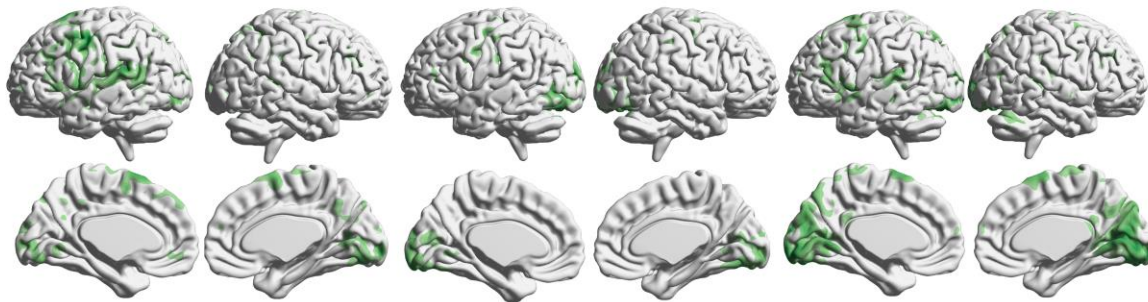

**Figure S1.** Illustration of activation variation in HC (A) and LTLE (B) for each GE2REC task. The standard deviation (SD) of task activation across participants within a group is projected onto a 3D anatomical template for sentence generation (A1, B1), recognition (A2, B2), and recall (A3, B3). The color scale indicates the SD value.

**Table S2.** Standard deviation (SD) for each AAL region for GE2REC tasks in LTLE and HC groups. Regions with SD higher than 2SD are marked in red. The highest variation was found in occipital regions for LTLE during recall and in occipital regions in HC during recognition. **Abbreviations:** GE = sentence generation with implicit encoding; RECO = recognition; RA = recall; LTLE = Left temporal lobe epilepsy; HC = Healthy controls.

| Lobe                        | AAL region           | LTLE<br>GE | LTLE<br>RECO | LTLE<br>RA | HC<br>GE | HC<br>RECO | HC<br>RA |
|-----------------------------|----------------------|------------|--------------|------------|----------|------------|----------|
| <b>Frontal</b>              | Frontal_Inf_Oper_L   | 1.83       | 1.58         | 1.80       | 1.99     | 1.53       | 1.62     |
|                             | Frontal_Inf_Oper_R   | 1.46       | 1.49         | 1.39       | 1.62     | 1.40       | 1.55     |
|                             | Frontal_Inf_Orb_2_L  | 1.57       | 1.35         | 1.55       | 1.70     | 1.34       | 1.42     |
|                             | Frontal_Inf_Orb_2_R  | 1.28       | 1.13         | 1.18       | 1.58     | 1.32       | 1.53     |
|                             | Frontal_Inf_Tri_L    | 1.75       | 1.56         | 1.91       | 1.78     | 1.54       | 1.79     |
|                             | Frontal_Inf_Tri_R    | 1.45       | 1.51         | 1.48       | 1.48     | 1.42       | 1.67     |
|                             | Frontal_Med_Orb_L    | 1.51       | 0.95         | 1.13       | 1.13     | 1.12       | 1.03     |
|                             | Frontal_Med_Orb_R    | 1.43       | 1.03         | 1.23       | 1.16     | 1.05       | 1.07     |
|                             | Frontal_Mid_2_L      | 1.72       | 1.32         | 1.61       | 1.58     | 1.37       | 1.64     |
|                             | Frontal_Mid_2_R      | 1.57       | 1.44         | 1.47       | 1.45     | 1.39       | 1.44     |
|                             | Frontal_Sup_2_L      | 1.49       | 1.29         | 1.49       | 1.43     | 1.30       | 1.40     |
|                             | Frontal_Sup_2_R      | 1.39       | 1.34         | 1.36       | 1.41     | 1.27       | 1.31     |
|                             | Frontal_Sup_Medial_L | 1.59       | 1.22         | 1.46       | 1.41     | 1.08       | 1.29     |
|                             | Frontal_Sup_Medial_R | 1.45       | 1.25         | 1.36       | 1.42     | 1.09       | 1.26     |
|                             | OFCant_L             | 1.05       | 0.82         | 0.82       | 0.82     | 0.84       | 0.76     |
|                             | OFCant_R             | 0.84       | 0.73         | 0.77       | 0.68     | 0.92       | 0.74     |
|                             | OFClat_L             | 1.04       | 1.01         | 0.89       | 0.95     | 0.76       | 0.76     |
|                             | OFClat_R             | 0.84       | 0.89         | 0.78       | 0.96     | 0.90       | 0.72     |
|                             | OFCmed_L             | 0.72       | 0.55         | 0.87       | 0.61     | 0.68       | 0.56     |
|                             | OFCmed_R             | 0.57       | 0.54         | 0.52       | 0.58     | 0.69       | 0.55     |
|                             | OFCpost_L            | 1.34       | 1.09         | 1.12       | 1.07     | 1.01       | 1.04     |
|                             | OFCpost_R            | 1.18       | 1.02         | 1.08       | 1.22     | 1.13       | 1.04     |
|                             | Olfactory_L          | 1.10       | 1.20         | 1.29       | 0.99     | 1.05       | 1.09     |
|                             | Olfactory_R          | 0.98       | 1.07         | 1.28       | 1.00     | 1.05       | 1.05     |
|                             | Paracentral_Lobule_L | 1.48       | 0.96         | 1.52       | 1.29     | 1.26       | 1.22     |
|                             | Paracentral_Lobule_R | 1.54       | 0.99         | 1.60       | 1.27     | 1.14       | 1.34     |
|                             | Precentral_L         | 1.49       | 1.31         | 1.50       | 1.34     | 1.36       | 1.34     |
|                             | Precentral_R         | 1.45       | 1.46         | 1.47       | 1.21     | 1.23       | 1.19     |
|                             | Rectus_L             | 0.72       | 0.60         | 0.86       | 0.75     | 0.67       | 0.70     |
|                             | Rectus_R             | 0.68       | 0.58         | 0.68       | 0.76     | 0.69       | 0.74     |
|                             | Rolandic_Oper_L      | 1.75       | 1.24         | 1.46       | 1.36     | 1.24       | 1.43     |
|                             | Rolandic_Oper_R      | 1.52       | 1.31         | 1.24       | 1.17     | 1.12       | 1.35     |
| Supp_Motor_Area_L           | 1.90                 | 1.42       | 1.72         | 1.95       | 1.48     | 1.91       |          |
| Supp_Motor_Area_R           | 1.59                 | 1.25       | 1.66         | 1.54       | 1.41     | 1.64       |          |
| <b>Insula and Cingulate</b> | Cingulate_Ant_L      | 1.53       | 1.24         | 1.29       | 1.20     | 1.10       | 1.24     |
|                             | Cingulate_Ant_R      | 1.40       | 1.28         | 1.21       | 1.20     | 1.13       | 1.11     |
|                             | Cingulate_Mid_L      | 1.51       | 1.12         | 1.33       | 1.35     | 1.23       | 1.30     |
|                             | Cingulate_Mid_R      | 1.47       | 1.19         | 1.30       | 1.38     | 1.25       | 1.30     |
|                             | Cingulate_Post_L     | 1.52       | 1.24         | 1.72       | 1.37     | 1.05       | 1.26     |
|                             | Cingulate_Post_R     | 1.59       | 1.27         | 1.69       | 1.33     | 1.01       | 1.23     |
|                             | Insula_L             | 1.50       | 1.15         | 1.36       | 1.24     | 1.16       | 1.39     |

|                           |                     |      |      |      |      |      |      |
|---------------------------|---------------------|------|------|------|------|------|------|
|                           | Insula_R            | 1.55 | 1.28 | 1.32 | 1.29 | 1.14 | 1.37 |
| <b>Temporal</b>           | Amygdala_L          | 1.01 | 1.28 | 1.34 | 1.16 | 0.99 | 1.15 |
|                           | Amygdala_R          | 1.16 | 1.12 | 0.99 | 1.12 | 0.97 | 0.91 |
|                           | Fusiform_L          | 1.28 | 1.54 | 1.41 | 1.15 | 1.71 | 1.27 |
|                           | Fusiform_R          | 1.30 | 1.41 | 1.34 | 1.10 | 1.73 | 1.16 |
|                           | Heschl_L            | 1.38 | 1.02 | 1.39 | 1.14 | 1.12 | 1.42 |
|                           | Heschl_R            | 1.35 | 1.17 | 1.30 | 1.11 | 1.00 | 1.43 |
|                           | Hippocampus_L       | 1.11 | 1.17 | 1.13 | 1.03 | 0.97 | 1.13 |
|                           | Hippocampus_R       | 1.29 | 1.09 | 1.11 | 1.02 | 0.97 | 1.01 |
|                           | ParaHippocampal_L   | 0.98 | 1.23 | 1.15 | 1.04 | 1.01 | 0.97 |
|                           | ParaHippocampal_R   | 1.17 | 1.12 | 1.12 | 1.08 | 1.09 | 0.96 |
|                           | Temporal_Inf_L      | 1.05 | 1.04 | 0.99 | 0.98 | 1.09 | 1.06 |
|                           | Temporal_Inf_R      | 1.05 | 1.01 | 0.98 | 0.91 | 1.11 | 0.94 |
|                           | Temporal_Mid_L      | 1.53 | 1.15 | 1.51 | 1.65 | 1.19 | 1.52 |
|                           | Temporal_Mid_R      | 1.36 | 1.14 | 1.48 | 1.30 | 1.30 | 1.30 |
|                           | Temporal_Pole_Mid_L | 0.85 | 0.64 | 0.83 | 1.07 | 0.66 | 0.83 |
|                           | Temporal_Pole_Mid_R | 0.99 | 0.75 | 0.95 | 0.96 | 0.74 | 0.84 |
|                           | Temporal_Pole_Sup_L | 1.29 | 0.91 | 1.47 | 1.57 | 0.93 | 1.20 |
|                           | Temporal_Pole_Sup_R | 1.29 | 0.92 | 1.38 | 1.36 | 1.03 | 1.35 |
|                           | Temporal_Sup_L      | 1.85 | 1.23 | 1.64 | 1.71 | 1.16 | 1.80 |
|                           | Temporal_Sup_R      | 1.49 | 1.08 | 1.65 | 1.44 | 1.14 | 1.60 |
| <b>Parietal</b>           | Angular_L           | 1.78 | 1.20 | 1.80 | 1.54 | 1.25 | 1.38 |
|                           | Angular_R           | 1.57 | 1.30 | 1.40 | 1.39 | 1.42 | 1.17 |
|                           | Parietal_Inf_L      | 1.81 | 1.55 | 1.67 | 1.58 | 1.47 | 1.48 |
|                           | Parietal_Inf_R      | 1.87 | 1.37 | 1.47 | 1.31 | 1.45 | 1.29 |
|                           | Parietal_Sup_L      | 1.54 | 1.32 | 1.51 | 1.19 | 1.53 | 1.20 |
|                           | Parietal_Sup_R      | 1.57 | 1.19 | 1.48 | 1.15 | 1.36 | 1.04 |
|                           | Postcentral_L       | 1.74 | 1.49 | 1.54 | 1.33 | 1.57 | 1.26 |
|                           | Postcentral_R       | 1.43 | 1.27 | 1.46 | 1.11 | 1.05 | 1.11 |
|                           | Precuneus_L         | 1.54 | 1.11 | 1.74 | 1.27 | 1.23 | 1.27 |
|                           | Precuneus_R         | 1.62 | 1.14 | 1.68 | 1.30 | 1.25 | 1.30 |
|                           | SupraMarginal_L     | 2.01 | 1.54 | 1.64 | 1.98 | 1.63 | 1.75 |
|                           | SupraMarginal_R     | 1.77 | 1.39 | 1.67 | 1.31 | 1.31 | 1.38 |
| <b>Occipital</b>          | Calcarine_L         | 1.68 | 1.90 | 2.26 | 1.77 | 2.09 | 1.92 |
|                           | Calcarine_R         | 1.92 | 1.89 | 2.39 | 1.74 | 2.10 | 1.86 |
|                           | Cuneus_L            | 1.51 | 1.44 | 2.00 | 1.52 | 1.56 | 1.53 |
|                           | Cuneus_R            | 1.79 | 1.61 | 2.29 | 1.70 | 1.82 | 1.66 |
|                           | Lingual_L           | 1.69 | 1.81 | 2.10 | 1.57 | 2.05 | 1.68 |
|                           | Lingual_R           | 1.82 | 1.83 | 2.23 | 1.52 | 2.08 | 1.79 |
|                           | Occipital_Inf_L     | 1.83 | 2.14 | 2.07 | 1.51 | 2.25 | 1.90 |
|                           | Occipital_Inf_R     | 1.91 | 2.01 | 2.15 | 1.37 | 2.14 | 1.57 |
|                           | Occipital_Mid_L     | 1.79 | 1.78 | 1.78 | 1.45 | 2.13 | 1.66 |
|                           | Occipital_Mid_R     | 1.86 | 1.80 | 1.83 | 1.51 | 2.04 | 1.49 |
|                           | Occipital_Sup_L     | 1.69 | 1.61 | 1.74 | 1.41 | 1.81 | 1.59 |
|                           | Occipital_Sup_R     | 1.83 | 1.88 | 2.00 | 1.65 | 2.13 | 1.49 |
| <b>Grey matter nuclei</b> | Caudate_L           | 1.28 | 1.10 | 1.23 | 1.00 | 1.14 | 1.13 |
|                           | Caudate_R           | 1.28 | 1.15 | 1.33 | 1.09 | 1.04 | 1.05 |
|                           | Pallidum_L          | 1.32 | 1.10 | 1.29 | 1.03 | 1.04 | 1.05 |
|                           | Pallidum_R          | 1.34 | 1.21 | 1.09 | 0.90 | 1.03 | 1.03 |

|                   |                   |      |      |      |      |      |      |
|-------------------|-------------------|------|------|------|------|------|------|
|                   | Putamen_L         | 1.16 | 1.12 | 1.26 | 1.07 | 1.06 | 1.17 |
|                   | Putamen_R         | 1.25 | 1.20 | 1.13 | 1.02 | 1.00 | 1.17 |
|                   | Thalamus_L        | 1.14 | 1.11 | 1.29 | 0.87 | 1.01 | 0.88 |
|                   | Thalamus_R        | 1.16 | 1.14 | 1.18 | 0.96 | 1.08 | 0.95 |
| <b>Cerebellum</b> | Cerebelum_10_L    | 1.14 | 0.81 | 1.02 | 0.74 | 1.06 | 0.64 |
|                   | Cerebelum_10_R    | 1.02 | 0.82 | 0.94 | 0.80 | 1.16 | 0.74 |
|                   | Cerebelum_3_L     | 1.00 | 1.18 | 1.36 | 0.96 | 1.12 | 1.00 |
|                   | Cerebelum_3_R     | 1.22 | 1.16 | 1.34 | 0.94 | 1.20 | 1.07 |
|                   | Cerebelum_4_5_L   | 1.30 | 1.21 | 1.43 | 1.13 | 1.25 | 1.07 |
|                   | Cerebelum_4_5_R   | 1.35 | 1.45 | 1.41 | 1.06 | 1.50 | 1.18 |
|                   | Cerebelum_6_L     | 1.52 | 1.59 | 1.75 | 1.45 | 1.89 | 1.54 |
|                   | Cerebelum_6_R     | 1.76 | 1.59 | 1.88 | 1.52 | 1.99 | 1.51 |
|                   | Cerebelum_7b_L    | 1.11 | 1.08 | 0.99 | 0.83 | 1.07 | 0.77 |
|                   | Cerebelum_7b_R    | 1.27 | 1.00 | 1.14 | 1.18 | 0.93 | 0.91 |
|                   | Cerebelum_8_L     | 1.16 | 1.04 | 1.01 | 0.86 | 0.95 | 0.89 |
|                   | Cerebelum_8_R     | 1.28 | 1.17 | 1.11 | 1.04 | 1.04 | 0.89 |
|                   | Cerebelum_9_L     | 1.08 | 0.92 | 1.08 | 0.89 | 0.89 | 0.80 |
|                   | Cerebelum_9_R     | 1.10 | 0.98 | 1.03 | 0.84 | 0.91 | 0.74 |
|                   | Cerebelum_Crus1_L | 1.27 | 1.34 | 1.52 | 1.23 | 1.85 | 1.43 |
|                   | Cerebelum_Crus1_R | 1.51 | 1.27 | 1.72 | 1.38 | 1.60 | 1.36 |
|                   | Cerebelum_Crus2_L | 1.11 | 1.11 | 1.22 | 0.99 | 1.20 | 1.05 |
|                   | Cerebelum_Crus2_R | 1.31 | 0.94 | 1.33 | 1.12 | 0.96 | 0.99 |
|                   | Vermis_1_2        | 0.97 | 1.35 | 1.32 | 0.96 | 1.16 | 0.97 |
|                   | Vermis_10         | 1.09 | 1.22 | 1.60 | 1.12 | 1.16 | 1.00 |
|                   | Vermis_3          | 1.15 | 1.24 | 1.47 | 1.19 | 1.02 | 0.97 |
|                   | Vermis_4_5        | 1.29 | 1.36 | 1.52 | 1.31 | 1.21 | 1.22 |
|                   | Vermis_6          | 1.57 | 1.29 | 1.75 | 1.34 | 1.68 | 1.37 |
|                   | Vermis_7          | 1.40 | 1.15 | 1.82 | 1.19 | 1.60 | 1.28 |
|                   | Vermis_8          | 1.11 | 1.40 | 1.50 | 1.20 | 1.28 | 1.10 |
|                   | Vermis_9          | 1.08 | 1.23 | 1.49 | 1.19 | 1.31 | 1.03 |

**Table S3.** Activated regions for the contrast GE (generation with implicit encoding) vs. baseline. For each peak, the number of voxels in the cluster (k), T value, x, y, z coordinates (in mm) and region label (AAL atlas, Tzourio-Mazoyer et al., 2002) are presented. Activations were obtained at  $T_{GE} > 6.89$  ( $p < 0.05$ , FWE). T values marked with \* were obtained at  $T_{GE} > 3.65$  ( $p < 0.001$ , uncorrected). Regions in bold represent cluster peaks.

| Contrast               | k         | T           | x          | y          | z          | AAL                      |
|------------------------|-----------|-------------|------------|------------|------------|--------------------------|
| <b>GE vs. baseline</b> | <b>69</b> | <b>9.99</b> | <b>42</b>  | <b>-60</b> | <b>-30</b> | <b>Cerebelum_Crus1_R</b> |
|                        |           | 7.97        | 33         | -60        | -27        | Cerebelum_6_R            |
|                        |           | 7.74        | 18         | -87        | -6         | Lingual_R                |
|                        |           | 6.67*       | 27         | -93        | 12         | Occipital_Mid_R          |
|                        |           | 7.65        | 21         | -96        | 15         | Occipital_Sup_R          |
|                        | <b>52</b> | 5.14*       | 24         | -81        | -15        | Fusiform_R               |
|                        |           | <b>9.55</b> | <b>21</b>  | <b>-96</b> | <b>9</b>   | <b>Cuneus_R</b>          |
|                        |           | 8.64        | 15         | -93        | 0          | Calcarine_R              |
|                        | <b>34</b> | 7.69        | 21         | -93        | 6          | Occipital_Sup_R          |
|                        |           | <b>9.36</b> | <b>-21</b> | <b>-93</b> | <b>3</b>   | <b>Occipital_Mid_L</b>   |

|           |  |             |            |            |            |                          |
|-----------|--|-------------|------------|------------|------------|--------------------------|
|           |  | 7.71        | -15        | -90        | -12        | Lingual_L                |
| <b>40</b> |  | <b>9.32</b> | <b>-3</b>  | <b>12</b>  | <b>60</b>  | <b>Supp_Mot_Area_L</b>   |
|           |  | 6.76*       | -54        | -39        | 12         | Temporal_Sup_L           |
| <b>42</b> |  | <b>9.28</b> | <b>60</b>  | <b>-15</b> | <b>-9</b>  | <b>Temporal_Sup_R</b>    |
|           |  | 7.49        | 60         | -12        | -12        | Temporal_Mid_R           |
| <b>22</b> |  | <b>8.58</b> | <b>-54</b> | <b>18</b>  | <b>18</b>  | <b>Frontal_Inf_Tri_L</b> |
|           |  | 8.24        | -54        | 15         | 18         | Frontal_Inf_Oper_L       |
|           |  | 6.56*       | -42        | 24         | -6         | Frontal_Inf_Orb_L        |
| <b>8</b>  |  | <b>8.28</b> | <b>-60</b> | <b>-18</b> | <b>-3</b>  | <b>Temporal_Mid_L</b>    |
| <b>8</b>  |  | <b>7.85</b> | <b>-39</b> | <b>15</b>  | <b>21</b>  | <b>Frontal_Inf_Tri_L</b> |
| <b>5</b>  |  | <b>7.46</b> | <b>-57</b> | <b>-39</b> | <b>3</b>   | <b>Temporal_Mid_L</b>    |
| <b>7</b>  |  | <b>7.42</b> | <b>-45</b> | <b>-60</b> | <b>-27</b> | <b>Cerebelum_Crus1_L</b> |
| 68        |  | 5.9*        | -15        | -24        | -18        | Parahippocampal_L        |
|           |  | 5.19*       | -18        | -24        | -9         | Hippocampus_L            |

**Table S4.** Activated regions for the contrast RECO (recognition) vs. baseline. For each peak, the number of voxels in the cluster (k), T value, x, y, z coordinates (in mm) and region label (AAL atlas, Tzourio-Mazoyer et al., 2002) and are presented. Activations were obtained at  $T_{RECO} > 7.03$  ( $p < 0.05$ , FWE). T values marked with \* were obtained at  $T_{RECO} > 3.65$  ( $p < 0.001$ , uncorrected). Regions in bold represent cluster peaks.

| Contrast                 | k           | T            | x            | y             | z                     | AAL                      |                        |
|--------------------------|-------------|--------------|--------------|---------------|-----------------------|--------------------------|------------------------|
| <b>RECO vs. baseline</b> | <b>828</b>  | <b>20.26</b> | <b>33</b>    | <b>-45</b>    | <b>-18</b>            | <b>Fusiform_R</b>        |                        |
|                          |             | 15.02        | 36           | -81           | -12                   | Occipital_Inf_R          |                        |
|                          |             | 14.05        | 21           | -93           | 0                     | Calcarine_R              |                        |
|                          |             | 16.4         | 30           | -48           | -21                   | Cerebelum_6_R            |                        |
|                          |             | 8.68         | 45           | -57           | -15                   | Temporal_Inf_R           |                        |
|                          |             | 8.08         | 24           | -81           | -9                    | Lingual_R                |                        |
|                          |             | <b>845</b>   | <b>17.50</b> | <b>-30</b>    | <b>-87</b>            | <b>6</b>                 | <b>Occipital_Mid_L</b> |
|                          |             | 14.50        | -15          | -90           | -9                    | Occipital_Mid_L          |                        |
|                          |             | 12.51        | -30          | -81           | -6                    | Occipital_Inf_L          |                        |
|                          |             | 11.44        | -36          | -51           | -21                   | Fusiform_L               |                        |
|                          | 11.17       | -42          | -57          | -24           | Cerebelum_6_L         |                          |                        |
|                          | 10.39       | -42          | -48          | -15           | Temporal_Inf_L        |                          |                        |
|                          | 7.68        | -30          | -81          | -15           | Lingual_L             |                          |                        |
|                          | <b>155</b>  | <b>11.88</b> | <b>3</b>     | <b>15</b>     | <b>45</b>             | <b>Supp_Motor_Area_L</b> |                        |
|                          | 8.15        | -3           | 6            | 57            | Supp_Motor_Area_L     |                          |                        |
|                          | 7.81        | -9           | -3           | 54            | Supp_Motor_Area_R     |                          |                        |
|                          | 8.5         | -3           | 21           | 42            | Frontal_Sup_Medial_L  |                          |                        |
|                          | 8.27        | -6           | 12           | 42            | Cingulate_Mid_L       |                          |                        |
|                          | 8.68        | 6            | 15           | 42            | Cingulate_Mid_R       |                          |                        |
|                          | <b>15</b>   | <b>10.20</b> | <b>-21</b>   | <b>-27</b>    | <b>-3</b>             | <b>Thalamus_L</b>        |                        |
| 7.13                     | -18         | -27          | 3            | Thalamus_L    |                       |                          |                        |
| 7.23                     | -21         | -27          | -6           | Hippocampus_L |                       |                          |                        |
| <b>176</b>               | <b>9.54</b> | <b>-27</b>   | <b>-51</b>   | <b>39</b>     | <b>Parietal_Inf_L</b> |                          |                        |

|           |              |            |            |            |                          |                 |
|-----------|--------------|------------|------------|------------|--------------------------|-----------------|
|           |              | 9.52       | -30        | -9         | 60                       | Precentral_L    |
|           |              | 8.50       | -36        | -36        | 39                       | Postcentral_L   |
|           |              | 7.26       | -27        | -9         | 57                       | Frontal_Sup_2_L |
| <b>11</b> | <b>8.50</b>  | <b>-48</b> | <b>3</b>   | <b>27</b>  | <b>Precentral_L</b>      |                 |
| <b>8</b>  | <b>8.23</b>  | <b>0</b>   | <b>0</b>   | <b>72</b>  | <b>Supp_Motor_Area_L</b> |                 |
| <b>17</b> | <b>7.64</b>  | <b>-24</b> | <b>-6</b>  | <b>6</b>   | <b>Putamen_L</b>         |                 |
| <b>6</b>  | <b>7.55</b>  | <b>-30</b> | <b>21</b>  | <b>3</b>   | <b>Insula_L</b>          |                 |
| <b>6</b>  | <b>7.52</b>  | <b>-45</b> | <b>18</b>  | <b>21</b>  | <b>Frontal_Inf_Tri_L</b> |                 |
| <b>5</b>  | <b>7.45</b>  | <b>30</b>  | <b>21</b>  | <b>0</b>   | <b>Putamen_R</b>         |                 |
| <b>84</b> | <b>6.55*</b> | <b>33</b>  | <b>-3</b>  | <b>-21</b> | <b>Amygdala_R</b>        |                 |
|           | 5.71*        | 30         | 15         | -21        | Insula_R                 |                 |
|           | 4.95*        | 24         | -6         | -21        | Hippocampus_R            |                 |
| <b>86</b> | <b>5.31*</b> | <b>30</b>  | <b>-54</b> | <b>48</b>  | <b>Parietal_Inf_R</b>    |                 |

**Table S5.** Activated regions for the contrast RA (sentence recall) vs. baseline. For each peak, the number of voxels in the cluster (k), T value, x, y, z coordinates (in mm) and region label (AAL atlas, Tzourio-Mazoyer et al., 2002) and are presented. Activations were obtained at  $T_{RA} > 6.85$  ( $p < 0.05$ , FWE). T values marked with \* were obtained at  $T_{RA} > 3.65$  ( $p < 0.001$ , uncorrected). Regions in bold represent cluster peaks.

| Contrast               | k          | T            | x          | y          | z         | AAL                         |
|------------------------|------------|--------------|------------|------------|-----------|-----------------------------|
| <b>RA vs. baseline</b> | <b>113</b> | <b>10.51</b> | <b>3</b>   | <b>30</b>  | <b>42</b> | <b>Frontal_Sup_Medial_L</b> |
|                        |            | 7.39         | -3         | 15         | 51        | Supp_Motor_Area_L           |
|                        |            | 10.4         | 6          | 27         | 42        | Frontal_Sup_Medial_R        |
|                        |            | 9.24         | 2          | 24         | 4         | Supp_Motor_Area_R           |
|                        |            | 4.85*        | -27        | -33        | -3        | Hippocampus_L               |
|                        | <b>102</b> | <b>10.50</b> | <b>-57</b> | <b>-21</b> | <b>0</b>  | <b>Temporal_Mid_L</b>       |
|                        |            | 7.76         | -54        | -36        | 9         | Temporal_Sup_L              |
|                        | <b>64</b>  | <b>9.14</b>  | <b>60</b>  | <b>-12</b> | <b>0</b>  | <b>Temporal_Sup_R</b>       |
|                        | <b>85</b>  | <b>4.68*</b> | <b>-30</b> | <b>-63</b> | <b>42</b> | <b>Parietal_Inf_L</b>       |
|                        | <b>43</b>  | <b>8.85</b>  | <b>30</b>  | <b>-90</b> | <b>12</b> | <b>Occipital_Mid_R</b>      |
|                        |            | 8.15         | 27         | -90        | 12        | Occipital_Sup_R             |
|                        | <b>23</b>  | <b>8.57</b>  | <b>-21</b> | <b>-96</b> | <b>3</b>  | <b>Occipital_Mid_L</b>      |
|                        | <b>34</b>  | <b>8.32</b>  | <b>-30</b> | <b>27</b>  | <b>-3</b> | <b>Insula_L</b>             |
|                        |            | 7.40         | -42        | 21         | -9        | Frontal_Inf_Orb_2_L         |
|                        | <b>26</b>  | <b>8.19</b>  | <b>-48</b> | <b>18</b>  | <b>24</b> | <b>Frontal_Inf_Tri_L</b>    |
|                        |            | 7.64         | -51        | 15         | 21        | Frontal_Inf_Oper_L          |
|                        | <b>5</b>   | <b>7.96</b>  | <b>-36</b> | <b>6</b>   | <b>51</b> | <b>Frontal_Mid_2_L</b>      |

**Table S6.** Percentage of the number of activated voxels in our regions of interest for language and memory included in the LMN. We generated maps for terms "language" and "memory" which yielded 1101 and 2744 studies respectively in the Neurosynth database. Those maps were binarized and added up. GE2REC LMN maps for HC and LTLE were obtained using second-level group analyses for each group for all three tasks. These maps were binarized (using as threshold  $p < 0.001$ , uncorrected and  $k > 5$ ) and added up. A less permissive threshold ( $p < 0.001$ , uncorrected and  $k > 5$ ) was used to binarize GE2REC activation given the limited number of participants compared to the number of meta-analyses and participants in Neurosynth. Each resulting image (Neurosynth LMN, LTLE LMN, and HC LMN) was projected on the AAL atlas. The percentage of activated voxels was calculated for each AAL region by dividing the number of activated voxels by the total number of voxels in a specific region. Regions including more than 30-50% activated voxels are yellow, 50-70% blue, and above 70% green. See also Figure 2. **Abbreviations:** HC = Healthy controls; LTLE = Left temporal lobe epilepsy.

| Lobe    | region               | Neurosynth | GE2REC HC | GE2REC LTLE |
|---------|----------------------|------------|-----------|-------------|
| Frontal | Frontal_Inf_Oper_L   | 81.41      | 84.78     | 87.76       |
|         | Frontal_Inf_Oper_R   | 8.36       | 38.10     | 21.02       |
|         | Frontal_Inf_Orb_2_L  | 69.29      | 60.81     | 53.93       |
|         | Frontal_Inf_Orb_2_R  | 2.97       | 29.63     | 18.31       |
|         | Frontal_Inf_Tri_L    | 77.50      | 69.67     | 74.22       |
|         | Frontal_Inf_Tri_R    | 25.10      | 18.78     | 37.94       |
|         | Frontal_Med_Orb_L    | 0.28       | 0.00      | 0.00        |
|         | Frontal_Med_Orb_R    | 0.00       | 0.00      | 0.00        |
|         | Frontal_Mid_2_L      | 36.15      | 14.66     | 16.17       |
|         | Frontal_Mid_2_R      | 23.21      | 8.48      | 3.29        |
|         | Frontal_Sup_2_L      | 9.30       | 14.28     | 13.87       |
|         | Frontal_Sup_2_R      | 9.19       | 2.30      | 0.20        |
|         | Frontal_Sup_Medial_L | 15.74      | 16.88     | 11.90       |
|         | Frontal_Sup_Medial_R | 1.78       | 7.45      | 6.94        |
|         | OFCant_L             | 2.26       | 0.00      | 0.90        |
|         | OFCant_R             | 0.46       | 0.31      | 0.00        |
|         | OFClat_L             | 61.93      | 0.00      | 0.00        |
|         | OFClat_R             | 0.00       | 0.00      | 0.00        |
|         | OFCmed_L             | 0.18       | 0.36      | 0.00        |
|         | OFCmed_R             | 0.00       | 0.32      | 0.00        |
|         | OFCpost_L            | 7.94       | 19.58     | 22.40       |
|         | OFCpost_R            | 0.53       | 13.19     | 9.27        |
|         | Olfactory_L          | 0.00       | 14.64     | 0.00        |
|         | Olfactory_R          | 0.00       | 2.42      | 6.92        |
|         | Paracentral_Lobule_L | 0.00       | 0.00      | 0.96        |
|         | Paracentral_Lobule_R | 0.00       | 0.00      | 0.00        |
|         | Precentral_L         | 32.90      | 58.14     | 59.61       |
|         | Precentral_R         | 3.43       | 18.60     | 0.59        |
|         | Rectus_L             | 0.23       | 0.00      | 0.00        |
|         | Rectus_R             | 0.00       | 2.15      | 0.00        |
|         | Rolandic_Oper_L      | 4.65       | 22.42     | 18.08       |
|         | Rolandic_Oper_R      | 1.35       | 2.10      | 6.69        |
|         | Supp_Motor_Area_L    | 28.78      | 67.68     | 67.91       |



|                             |                     |       |       |       |
|-----------------------------|---------------------|-------|-------|-------|
|                             | Supp_Motor_Area_R   | 1.56  | 47.20 | 32.60 |
| <b>Insula and Cingulate</b> | Cingulate_Ant_L     | 0.07  | 30.64 | 6.93  |
|                             | Cingulate_Ant_R     | 0.00  | 22.85 | 3.58  |
|                             | Cingulate_Mid_L     | 6.03  | 23.13 | 17.52 |
|                             | Cingulate_Mid_R     | 3.72  | 25.51 | 17.34 |
|                             | Cingulate_Post_L    | 54.00 | 7.13  | 0.00  |
|                             | Cingulate_Post_R    | 9.25  | 3.88  | 0.00  |
|                             | Insula_L            | 9.47  | 54.47 | 35.90 |
|                             | Insula_R            | 3.39  | 38.59 | 19.60 |
| <b>Temporal</b>             | Amygdala_L          | 0.00  | 67.73 | 0.00  |
|                             | Amygdala_R          | 0.00  | 41.53 | 32.66 |
|                             | Fusiform_L          | 35.19 | 66.06 | 58.66 |
|                             | Fusiform_R          | 17.24 | 60.72 | 56.16 |
|                             | Heschl_L            | 15.56 | 27.56 | 34.22 |
|                             | Heschl_R            | 3.61  | 0.80  | 30.92 |
|                             | Hippocampus_L       | 84.23 | 56.55 | 12.77 |
|                             | Hippocampus_R       | 83.62 | 35.41 | 14.69 |
|                             | ParaHippocampal_L   | 65.54 | 19.84 | 4.29  |
|                             | ParaHippocampal_R   | 61.66 | 15.55 | 7.86  |
|                             | Temporal_Inf_L      | 19.03 | 13.16 | 10.69 |
|                             | Temporal_Inf_R      | 3.65  | 13.24 | 11.02 |
|                             | Temporal_Mid_L      | 55.56 | 35.63 | 28.45 |
|                             | Temporal_Mid_R      | 12.25 | 21.46 | 9.53  |
|                             | Temporal_Pole_Mid_L | 8.74  | 2.65  | 0.00  |
|                             | Temporal_Pole_Mid_R | 11.71 | 6.23  | 1.43  |
|                             | Temporal_Pole_Sup_L | 31.05 | 34.55 | 19.92 |
|                             | Temporal_Pole_Sup_R | 16.67 | 22.42 | 11.43 |
|                             | Temporal_Sup_L      | 55.57 | 67.20 | 56.18 |
|                             | Temporal_Sup_R      | 33.78 | 35.12 | 42.02 |
| <b>Parietal</b>             | Angular_L           | 44.93 | 9.38  | 11.17 |
|                             | Angular_R           | 20.66 | 13.24 | 4.85  |
|                             | Parietal_Inf_L      | 36.09 | 52.19 | 53.09 |
|                             | Parietal_Inf_R      | 24.01 | 7.81  | 7.43  |
|                             | Parietal_Sup_L      | 18.74 | 37.87 | 21.65 |
|                             | Parietal_Sup_R      | 4.32  | 13.46 | 2.75  |
|                             | Postcentral_L       | 6.27  | 50.00 | 39.11 |
|                             | Postcentral_R       | 1.44  | 15.38 | 0.92  |
|                             | Precuneus_L         | 20.80 | 2.55  | 1.16  |
|                             | Precuneus_R         | 22.11 | 2.17  | 0.25  |
|                             | SupraMarginal_L     | 5.41  | 12.10 | 15.84 |
|                             | SupraMarginal_R     | 3.50  | 3.09  | 0.30  |
| <b>Occipital</b>            | Calcarine_L         | 7.48  | 66.08 | 27.77 |
|                             | Calcarine_R         | 4.51  | 77.92 | 35.36 |
|                             | Cuneus_L            | 7.01  | 17.37 | 0.07  |
|                             | Cuneus_R            | 3.51  | 21.70 | 8.92  |
|                             | Lingual_L           | 5.68  | 80.33 | 38.81 |
|                             | Lingual_R           | 7.91  | 80.74 | 32.57 |
|                             | Occipital_Inf_L     | 16.58 | 71.52 | 62.17 |
|                             | Occipital_Inf_R     | 1.01  | 42.37 | 37.51 |

|                           |                    |       |       |       |
|---------------------------|--------------------|-------|-------|-------|
|                           | Occipital_Mid_L    | 14.65 | 50.49 | 51.74 |
|                           | Occipital_Mid_R    | 8.67  | 41.85 | 33.41 |
|                           | Occipital_Sup_L    | 2.42  | 44.07 | 27.38 |
|                           | Occipital_Sup_R    | 4.74  | 48.48 | 16.49 |
| <b>Grey matter nuclei</b> | Caudate_L          | 3.12  | 19.02 | 8.00  |
|                           | Caudate_R          | 0.80  | 59.26 | 6.34  |
|                           | Pallidum_L         | 1.37  | 76.79 | 79.52 |
|                           | Pallidum_R         | 0.00  | 41.43 | 42.86 |
|                           | Putamen_L          | 0.50  | 82.06 | 69.38 |
|                           | Putamen_R          | 0.75  | 32.80 | 20.49 |
|                           | Thalamus_L         | 0.91  | 79.64 | 52.55 |
|                           | Thalamus_R         | 0.76  | 44.75 | 8.42  |
| <b>Cerebellum</b>         | Cerebellum_10_L    | 0.00  | 0.00  | 0.00  |
|                           | Cerebellum_10_R    | 0.00  | 0.00  | 0.00  |
|                           | Cerebellum_3_L     | 4.41  | 1.47  | 0.00  |
|                           | Cerebellum_3_R     | 5.80  | 1.45  | 0.00  |
|                           | Cerebellum_4_5_L   | 4.62  | 34.22 | 15.73 |
|                           | Cerebellum_4_5_R   | 11.85 | 73.05 | 32.06 |
|                           | Cerebellum_6_L     | 0.71  | 79.99 | 58.50 |
|                           | Cerebellum_6_R     | 6.96  | 84.51 | 85.13 |
|                           | Cerebellum_7b_L    | 0.00  | 4.27  | 0.00  |
|                           | Cerebellum_7b_R    | 4.31  | 0.00  | 0.00  |
|                           | Cerebellum_8_L     | 0.00  | 6.68  | 0.00  |
|                           | Cerebellum_8_R     | 2.12  | 3.16  | 1.60  |
|                           | Cerebellum_9_L     | 0.00  | 1.73  | 0.00  |
|                           | Cerebellum_9_R     | 0.12  | 3.83  | 0.00  |
|                           | Cerebellum_Crus1_L | 2.07  | 27.24 | 25.12 |
|                           | Cerebellum_Crus1_R | 9.03  | 30.10 | 29.53 |
|                           | Cerebellum_Crus2_L | 0.05  | 5.86  | 2.27  |
|                           | Cerebellum_Crus2_R | 2.74  | 4.96  | 3.12  |
|                           | Vermis_1_2         | 0.00  | 0.00  | 0.00  |
|                           | Vermis_10          | 0.00  | 0.00  | 0.00  |
|                           | Vermis_3           | 1.32  | 17.11 | 18.42 |
|                           | Vermis_4_5         | 3.61  | 55.79 | 22.26 |
|                           | Vermis_6           | 5.12  | 93.26 | 29.38 |
|                           | Vermis_7           | 33.51 | 90.72 | 62.37 |
|                           | Vermis_8           | 0.82  | 66.26 | 0.41  |
|                           | Vermis_9           | 0.00  | 47.13 | 0.00  |

Since data did not meet the criteria for ANOVA (normality  $W = 0.879, p < .001$ ), we performed Kruskal–Wallis tests for each lobe. The results showed that there was no significant difference in the general coverage of the frontal ( $\chi^2(2) = 0.682, p = .711$ ), temporal ( $\chi^2(2) = 3.07, p = .216$ ), and parietal lobe ( $\chi^2(2) = 1.94, p = .379$ ) nor insula and cingulum ( $\chi^2(2) = 5.87, p = .05$ ). Although by comparing the percentages directly, we can see that the mesial temporal regions were less activated than expected, especially in the LTLE group. Significant differences between the general lobe coverage were found for grey matter nuclei ( $\chi^2(2) = 16.2, p < .001$ ; DSCF<sup>1</sup> post-hoc showed higher coverage using GE2REC both in HC ( $W = 4.75, p = .002$ ) and LTLE ( $W = 4.75, p = .002$ ) than based on Neurosynth maps, while there was no difference between HC and LTLE ( $W = -1.93, p = .359$ ), the occipital lobe ( $\chi^2(2) = 22.7, p < .001$ , higher coverage using GE2REC both in HC ( $W = 5.88, p < .001$ ) and LTLE ( $W = 4.65, p = .003$ ) than based on Neurosynth maps, while the coverage was greater in HC than LTLE ( $W = -3.59, p = .03$ ) and the cerebellum ( $\chi^2(2) = 7.57, p = .023$ , higher coverage using GE2REC in HC ( $W = 3.756, p = .022$ ) than based on Neurosynth maps, while there was no difference between Neurosynth and LTLE ( $W = 0.45, p = .945$ ), nor between HC and LTLE ( $W = -2.845, p = .109$ ).

---

<sup>1</sup> Dwass-Steel-Critchlow-Flinger pairwise comparisons

**Table S7.** Lateralization indices for GE2REC tasks in LTLE and HC. Values in bold indicate bilateral ( $-0.2 < LI < 0.2$ ) and those in red right hemispheric predominance (Seghier, 2019). LIs in LTLE marked with \* are significantly different ( $p < .05$ ) compared to HC (Crawford & Garthwaite, 2002). The number of participants in each group showing left, bilateral and right predominance for frontal, temporal and hippocampus for each task is presented in blue. Levene's test results for the equality of variance and Mann-Whitney U for testing differences between LTLE and HC for each lobe/structure are also presented. **Abbreviations:** N = participant number; LTLE = Left temporal lobe epilepsy; HC = Healthy controls; L = left-lateralized; B = bilateral; R = right lateralized; M = Mean; SD = standard deviation; Var diff = value of Levene's test for the equality of variances with corresponding p value; Diff = Values of Mann-Whitney U for testing differences between LTLE and HC with corresponding p value.

|             | N   | Sentence generation with encoding |              |               | Recognition of items |               |              | Recall        |               |               |
|-------------|-----|-----------------------------------|--------------|---------------|----------------------|---------------|--------------|---------------|---------------|---------------|
|             |     | Frontal                           | Temporal     | Hippocampus   | Frontal              | Temporal      | Hippocampus  | Frontal       | Temporal      | Hippocampus   |
| <b>LTLE</b> | P1  | 0.71                              | 0.66         | 0.73          | <b>-0.086*</b>       | 0.41          | <b>-0.39</b> | 0.59          | 0.64          | <b>-0.38</b>  |
|             | P2  | 0.71                              | 0.53         | 0.38          | <b>0.081*</b>        | <b>0.0034</b> | <b>-0.63</b> | 0.7           | 0.46          | 0.69          |
|             | P3  | 0.82                              | <b>0.14</b>  | 0.28          | <b>-0.37*</b>        | 0.34          | 0.26         | 0.91          | 0.35          | 0.53          |
|             | P4  | 0.87                              | 0.64         | <b>0.14</b>   | <b>-0.4*</b>         | <b>0.026</b>  | <b>-0.55</b> | 0.53          | 0.37          | 0.84          |
|             | P5  | 0.83                              | 0.35         | <b>-0.73</b>  | <b>0.033*</b>        | <b>0.072</b>  | 0.49         | 0.56          | 0.24          | <b>-0.31</b>  |
|             | P6  | <b>-0.042*</b>                    | 0.27         | <b>-0.73</b>  | 0.66                 | <b>-0.24</b>  | <b>0.13</b>  | <b>0.079</b>  | <b>0.2</b>    | 0.96          |
|             | P7  | 0.86                              | 0.38         | 0.81          | 0.52                 | <b>-0.29</b>  | <b>-0.8</b>  | 0.43          | 0.32          | <b>-0.38</b>  |
|             | P8  | <b>-0.58*</b>                     | <b>0.12</b>  | <b>-0.57</b>  | 0.63                 | 0.25          | <b>-0.13</b> | <b>-0.81*</b> | <b>-0.71*</b> | <b>-0.15</b>  |
|             | P9  | 0.56                              | <b>0.14</b>  | <b>0.1</b>    | 0.53                 | <b>-0.45*</b> | 0.25         | <b>-0.14*</b> | 0.21          | 0.48          |
|             | P10 | 0.94                              | 0.61         | 0.97          | 0.62                 | 0.52          | 0.31         | 0.7           | 0.31          | 0.39          |
|             | P11 | 0.83                              | 0.55         | <b>0.059</b>  | 0.84                 | 0.4           | <b>0.11</b>  | 0.85          | 0.71          | <b>0.11</b>   |
|             | P12 | 0.53                              | 0.75         | <b>-0.91</b>  | 0.67                 | <b>-0.35</b>  | <b>-0.58</b> | <b>0.036</b>  | 0.52          | 0.86          |
|             | P13 | <b>-0.52*</b>                     | <b>-0.2*</b> | <b>-0.55</b>  | 0.57                 | 0.29          | <b>-0.44</b> | <b>-0.42*</b> | 0.26          | <b>-0.82</b>  |
|             | P14 | 0.76                              | 0.63         | 0.75          | 0.58                 | <b>-0.51*</b> | <b>-0.26</b> | 0.46          | 0.55          | 0.64          |
|             | P15 | 0.8                               | 0.65         | 0.44          | 0.56                 | <b>-0.19</b>  | <b>-0.41</b> | 0.84          | 0.75          | 0.81          |
|             | P16 | 0.43                              | 0.74         | <b>-0.74</b>  | 0.71                 | <b>0.15</b>   | <b>-0.25</b> | 0.69          | 0.4           | <b>0.017</b>  |
|             | P17 | 0.71                              | 0.81         | 0.77          | 0.78                 | <b>-0.34</b>  | 0.79         | 0.85          | 0.83          | 0.77          |
|             | P18 | 0.82                              | 0.48         | <b>-0.84</b>  | 0.57                 | <b>-0.2</b>   | <b>-0.64</b> | 0.73          | 0.5           | <b>-0.8</b>   |
| <b>HC</b>   | HC1 | 0.65                              | 0.68         | 0.94          | 0.52                 | <b>-0.12</b>  | <b>0.17</b>  | 0.49          | 0.75          | <b>0.11</b>   |
|             | HC2 | 0.79                              | 0.58         | <b>-0.29</b>  | 0.65                 | <b>-0.41</b>  | 0.39         | 0.62          | <b>-0.12</b>  | <b>-0.12</b>  |
|             | HC3 | 0.83                              | 0.53         | <b>-0.085</b> | 0.43                 | <b>-0.14</b>  | <b>-0.51</b> | 0.6           | 0.56          | <b>-0.017</b> |

|      |             |               |              |      |               |               |              |              |              |
|------|-------------|---------------|--------------|------|---------------|---------------|--------------|--------------|--------------|
| HC4  | <b>0.00</b> | <b>-0.077</b> | 0.3          | 0.33 | 0.34          | <b>-0.049</b> | <b>-0.12</b> | <b>0.19</b>  | <b>-0.81</b> |
| HC5  | 0.54        | <b>0.031</b>  | 0.33         | 0.58 | <b>0.0071</b> | 0.77          | 0.49         | <b>-0.34</b> | 0.68         |
| HC6  | 0.70        | 0.58          | 0.56         | 0.73 | <b>0.16</b>   | 0.53          | 0.82         | 0.71         | 0.83         |
| HC7  | <b>0.12</b> | <b>0.2</b>    | 0.35         | 0.4  | 0.4           | 0.29          | 0.81         | 0.71         | 0.75         |
| HC8  | 0.70        | 0.72          | <b>0.11</b>  | 0.38 | 0.49          | 0.24          | 0.67         | 0.63         | <b>-0.24</b> |
| HC9  | 0.76        | 0.68          | 0.67         | 0.7  | <b>0.078</b>  | <b>-0.057</b> | 0.66         | 0.41         | <b>0.1</b>   |
| HC10 | 0.50        | <b>-0.039</b> | 0.46         | 0.55 | <b>-0.17</b>  | 0.027         | 0.57         | 0.38         | <b>-0.87</b> |
| HC11 | 0.72        | 0.58          | <b>-0.49</b> | 0.68 | 0.29          | 0.29          | 0.74         | 0.22         | <b>-0.7</b>  |
| HC12 | 0.74        | 0.56          | 0.54         | 0.68 | <b>-0.1</b>   | 0.51          | 0.42         | <b>0.1</b>   | <b>0.022</b> |
| HC13 | 0.58        | 0.56          | 0.36         | 0.69 | <b>0.068</b>  | <b>-0.089</b> | 0.46         | <b>0.16</b>  | 0.63         |
| HC14 | 0.85        | 0.51          | 0.23         | 0.77 | 0.27          | <b>-0.089</b> | 0.72         | <b>0.18</b>  | 0.35         |
| HC15 | 0.79        | <b>0.015</b>  | 0.57         | 0.54 | <b>0.16</b>   | <b>-0.5</b>   | 0.51         | <b>-0.21</b> | <b>-0.69</b> |
| HC16 | 0.84        | 0.81          | 0.69         | 0.56 | 0.58          | <b>-0.41</b>  | 0.77         | 0.76         | <b>-0.9</b>  |
| HC17 | 0.67        | 0.62          | 0.63         | 0.75 | <b>-0.29</b>  | <b>-0.3</b>   | 0.58         | 0.68         | 0.85         |
| HC18 | 0.44        | 0.81          | 0.65         | 0.63 | <b>0.15</b>   | 0.5           | <b>0.061</b> | 0.53         | 0.47         |
| HC19 | 0.53        | 0.57          | 0.59         | 0.64 | 0.23          | <b>0.052</b>  | 0.57         | 0.54         | 0.57         |

|                  |      |            |            |            |            |            |            |            |            |            |
|------------------|------|------------|------------|------------|------------|------------|------------|------------|------------|------------|
| <b>LTLE</b>      | L    | 15 (83.3%) | 14 (77.8%) | 8 (44.4%)  | 13 (72.2%) | 6 (33.3%)  | 5 (27.8%)  | 13 (72.2%) | 16 (88.9%) | 10 (55.6%) |
|                  | B    | 1 (5.6%)   | 4 (22.2%)  | 3 (16.7%)  | 3 (16.7%)  | 6 (33.3%)  | 3 (16.7%)  | 3 (16.7%)  | 1 (5.6%)   | 3 (16.7%)  |
|                  | R    | 2 (11.1%)  | 0 (0%)     | 7 (38.9%)  | 2 (11.1%)  | 6 (33.3%)  | 10 (55.6%) | 2 (11.1%)  | 1 (5.6%)   | 5 (27.8%)  |
| <b>HC</b>        | L    | 17 (89.5%) | 14 (73.7%) | 15 (78.9%) | 19 (100%)  | 7 (36.8%)  | 8 (42.1%)  | 17 (89.5%) | 12 (63.2%) | 8 (42.1%)  |
|                  | B    | 2 (10.5%)  | 5 (26.3%)  | 2 (10.5%)  | 0 (0%)     | 10 (52.6%) | 7 (36.8%)  | 2 (10.5%)  | 5 (26.3%)  | 5 (26.3%)  |
|                  | R    | 0 (0%)     | 0 (0%)     | 2 (10.5%)  | 0 (0%)     | 2 (10.5%)  | 4 (21.1%)  | 0 (0%)     | 2 (10.5%)  | 6 (31.6%)  |
| <b>M</b>         | LTLE | 0.56       | 0.46       | 0.02       | 0.42       | -0.01      | -0.15      | 0.42       | 0.38       | 0.24       |
|                  | HC   | 0.62       | 0.47       | 0.37       | 0.59       | 0.11       | 0.09       | 0.55       | 0.36       | 0.05       |
| <b>SD</b>        | LTLE | 0.462      | 0.273      | 0.664      | 0.385      | 0.326      | 0.45       | 0.11       | 0.332      | 0.139      |
|                  | HC   | 0.231      | 0.289      | 0.358      | 0.131      | 0.265      | 0.367      | 0.05       | 0.339      | 0.14       |
| <b>Var diff.</b> |      | 3.98       | 0.04       | 12.69      | 16.45      | 1.85       | 1.356      | 7.36       | 1.05       | 0.003      |
| <b>p</b>         |      | 0.054      | 0.842      | <.001*     | <.001*     | 0.183      | 0.252      | 0.01*      | 0.310      | 0.953      |
| <b>Diff</b>      |      | 145        | 167        | 124        | 138        | 135        | 112        | 167        | 163        | 139        |
| <b>p</b>         |      | 0.438      | 0.903      | 0.158      | 0.323      | 0.274      | 0.073      | 0.903      | 0.808      | 0.331      |

**Table S8.** Activation differences between healthy and patients during GE (generation with implicit encoding). For each peak, the number of voxels in the cluster (k), T value, x, y, z coordinates (in mm) and region label (AAL atlas, Tzourio-Mazoyer et al., 2002) are presented. All activations were obtained at  $T > 3.35$  ( $p < 0.001$ , uncorrected). Regions in bold represent cluster peaks.

| Contrast                      | k                          | T           | x          | y          | z         | AAL                         |
|-------------------------------|----------------------------|-------------|------------|------------|-----------|-----------------------------|
| <b>HC&gt;</b><br><b>LTLE</b>  | <b>155</b>                 | <b>5.05</b> | <b>-15</b> | <b>-12</b> | <b>48</b> | <b>Cingulate_Mid_L</b>      |
|                               |                            | 4.59        | -6         | 12         | 51        | Supp_Motor_Area_L           |
|                               |                            | 4.43        | 12         | 12         | 57        | Supp_Motor_Area_R           |
|                               | <b>80</b>                  | <b>4.95</b> | <b>-21</b> | <b>-54</b> | <b>45</b> | <b>Parietal_Sup_L</b>       |
|                               |                            | 3.51        | -27        | -51        | 48        | Parietal_Inf_L              |
|                               | <b>156</b>                 | <b>4.81</b> | <b>45</b>  | <b>-18</b> | <b>45</b> | <b>Precentral_R</b>         |
|                               |                            | 4.37        | 45         | -36        | 48        | Parietal_Inf_R              |
|                               |                            | 4.11        | 42         | -27        | 54        | Postcentral_R               |
|                               | <b>84</b>                  | <b>4.51</b> | <b>27</b>  | <b>45</b>  | <b>21</b> | <b>Frontal_Sup_2_R</b>      |
|                               |                            | 4.12        | 33         | 36         | 24        | Frontal_Mid_2_R             |
|                               | <b>9</b>                   | <b>4.48</b> | <b>-9</b>  | <b>-21</b> | <b>0</b>  | <b>Thalamus_L</b>           |
|                               | <b>29</b>                  | <b>4.47</b> | <b>48</b>  | <b>0</b>   | <b>30</b> | <b>Precentral_R</b>         |
|                               | <b>50</b>                  | <b>4.32</b> | <b>54</b>  | <b>12</b>  | <b>3</b>  | <b>Frontal_Inf_Oper_R</b>   |
|                               | <b>27</b>                  | <b>4.25</b> | <b>6</b>   | <b>6</b>   | <b>0</b>  | <b>Caudate_R</b>            |
|                               | <b>10</b>                  | <b>4.12</b> | <b>-36</b> | <b>12</b>  | <b>30</b> | <b>Frontal_Inf_Oper_L</b>   |
|                               | <b>23</b>                  | <b>4.08</b> | <b>-48</b> | <b>9</b>   | <b>0</b>  | <b>Frontal_Inf_Oper_L</b>   |
|                               | <b>20</b>                  | <b>4.06</b> | <b>-9</b>  | <b>18</b>  | <b>30</b> | <b>Cingulate_Ant_L</b>      |
|                               | <b>5</b>                   | <b>4.04</b> | <b>6</b>   | <b>-30</b> | <b>66</b> | <b>Paracentral_Lobule_R</b> |
|                               | <b>12</b>                  | <b>3.93</b> | <b>-15</b> | <b>12</b>  | <b>-3</b> | <b>Putamen_L</b>            |
|                               | <b>18</b>                  | <b>3.84</b> | <b>-48</b> | <b>-33</b> | <b>6</b>  | <b>Temporal_Sup_L</b>       |
|                               | <b>19</b>                  | <b>3.73</b> | <b>-45</b> | <b>0</b>   | <b>45</b> | <b>Precentral_L</b>         |
|                               |                            | 3.72        | -36        | -3         | 42        | Precentral_L                |
|                               | <b>7</b>                   | <b>3.71</b> | <b>-12</b> | <b>-42</b> | <b>51</b> | <b>Cingulate_Mid_L</b>      |
|                               | <b>6</b>                   | <b>3.69</b> | <b>9</b>   | <b>-24</b> | <b>51</b> | <b>Supp_Motor_Area_R</b>    |
|                               | <b>25</b>                  | <b>3.65</b> | <b>24</b>  | <b>-57</b> | <b>42</b> | <b>Angular_R</b>            |
|                               |                            | 3.50        | 12         | -66        | 42        | Precuneus_R                 |
|                               | <b>6</b>                   | <b>3.57</b> | <b>-33</b> | <b>18</b>  | <b>-3</b> | <b>Insula_L</b>             |
|                               | <b>7</b>                   | <b>3.54</b> | <b>-45</b> | <b>-18</b> | <b>42</b> | <b>Postcentral_L</b>        |
| <b>LTLE &gt;</b><br><b>HC</b> | No suprathreshold clusters |             |            |            |           |                             |

**Table S9.** Activation differences between healthy and patients during RECO (recognition). For each peak, the number of voxels in the cluster (k), T value, x, y, z coordinates (in mm) and region label (AAL atlas, Tzourio-Mazoyer et al., 2002) are presented. All activations were obtained at  $T > 3.35$  ( $p < 0.001$ , uncorrected). Regions in bold represent cluster peaks.

| Contrast                      | k         | T           | x          | y          | z          | AAL                  |
|-------------------------------|-----------|-------------|------------|------------|------------|----------------------|
| <b>HC &gt;</b><br><b>LTLE</b> | <b>63</b> | <b>5.07</b> | <b>-33</b> | <b>-36</b> | <b>45</b>  | <b>Postcentral_L</b> |
|                               |           | 3.76        | -27        | -45        | 42         | Parietal_Inf_L       |
|                               | <b>70</b> | <b>4.58</b> | <b>27</b>  | <b>-54</b> | <b>-12</b> | <b>Fusiform_R</b>    |

|                     |           |                            |            |            |            |                        |
|---------------------|-----------|----------------------------|------------|------------|------------|------------------------|
|                     |           | 3.77                       | 21         | -45        | -15        | Fusiform_R             |
|                     |           | 3.60                       | 45         | -48        | 0          | Temporal_Mid_R         |
|                     | <b>12</b> | <b>4.25</b>                | <b>24</b>  | <b>-84</b> | <b>-9</b>  | <b>Lingual_R</b>       |
|                     | <b>10</b> | <b>3.89</b>                | <b>-45</b> | <b>-21</b> | <b>24</b>  | <b>Rolandic_Oper_L</b> |
|                     | <b>12</b> | <b>3.89</b>                | <b>27</b>  | <b>-72</b> | <b>51</b>  | <b>Parietal_Sup_R</b>  |
|                     | <b>8</b>  | <b>3.88</b>                | <b>-33</b> | <b>-18</b> | <b>57</b>  | <b>Precentral_L</b>    |
|                     | <b>12</b> | <b>3.86</b>                | <b>-33</b> | <b>-75</b> | <b>15</b>  | <b>Occipital_Mid_L</b> |
|                     |           | 3.61                       | -24        | -84        | 15         | Occipital_Mid_L        |
|                     | <b>15</b> | <b>3.86</b>                | <b>-24</b> | <b>-63</b> | <b>-9</b>  | <b>Lingual_L</b>       |
|                     |           | 3.76                       | -27        | -60        | -9         | Fusiform_L             |
|                     | <b>8</b>  | <b>3.69</b>                | <b>-39</b> | <b>-75</b> | <b>-3</b>  | <b>Occipital_Mid_L</b> |
|                     |           | 3.63                       | -33        | -84        | -3         | Occipital_Mid_L        |
|                     | <b>5</b>  | <b>3.67</b>                | <b>0</b>   | <b>3</b>   | <b>30</b>  | <b>Cingulate_Ant_L</b> |
|                     | <b>11</b> | <b>3.64</b>                | <b>45</b>  | <b>-54</b> | <b>-15</b> | <b>Temporal_Inf_R</b>  |
|                     | <b>8</b>  | <b>3.57</b>                | <b>36</b>  | <b>-75</b> | <b>0</b>   | <b>Occipital_Mid_R</b> |
| <b>LTLE &gt; HC</b> |           | No suprathreshold clusters |            |            |            |                        |

**Table S10.** Activation differences between healthy and patients during RA (sentence recall). For each peak, the number of voxels in the cluster (k), T value, x, y, z coordinates (in mm) and region label (AAL atlas, Tzourio-Mazoyer et al., 2002) are presented. Activations were obtained at  $T > 3.35$  ( $p < 0.001$ , uncorrected). Regions in bold represent cluster peaks.

| Contrast            | k         | T                          | x         | y         | z         | AAL                       |
|---------------------|-----------|----------------------------|-----------|-----------|-----------|---------------------------|
| <b>HC &gt; LTLE</b> | <b>19</b> | <b>4.40</b>                | <b>51</b> | <b>15</b> | <b>3</b>  | <b>Frontal_Inf_Oper_R</b> |
|                     | <b>13</b> | <b>4.08</b>                | <b>39</b> | <b>12</b> | <b>-9</b> | <b>Insula_R</b>           |
|                     | <b>21</b> | <b>3.82</b>                | <b>0</b>  | <b>15</b> | <b>51</b> | <b>Supp_Motor_Area_L</b>  |
|                     |           | 3.43                       | 6         | 15        | 54        | Supp_Motor_Area_R         |
|                     | <b>11</b> | <b>3.73</b>                | <b>36</b> | <b>24</b> | <b>0</b>  | <b>Insula_R</b>           |
| <b>LTLE &gt; HC</b> |           | No suprathreshold clusters |           |           |           |                           |

**Table S11.** Activated regions for the contrast GE (generation with implicit encoding) vs. baseline for P1 before surgery. For each peak, the number of voxels in the cluster (k), T value, x, y, z coordinates (in mm) and region label (AAL atlas, Tzourio-Mazoyer et al., 2002) are presented. Activations were obtained at  $T > 4.59$  ( $p < 0.05$ , FWE). Values marked with \* were obtained at  $T > 3.1$  ( $p < 0.001$ , uncorrected). Regions in bold represent cluster peaks.

| Contrast               | k           | T           | x          | y          | z          | AAL                    |
|------------------------|-------------|-------------|------------|------------|------------|------------------------|
| <b>GE vs. baseline</b> | <b>172</b>  | <b>6.47</b> | <b>-63</b> | <b>-6</b>  | <b>-6</b>  | <b>Temporal_Mid_L</b>  |
|                        |             | 6.40        | -57        | -30        | 0          | Temporal_Mid_L         |
|                        |             | 5.73        | -48        | -33        | 0          | Temporal_Mid_L         |
|                        | <b>11</b>   | <b>6.16</b> | <b>-9</b>  | <b>-96</b> | <b>24</b>  | <b>Cuneus_L</b>        |
|                        |             | 4.35*       | -15        | -102       | 12         | Occipital_Sup_L        |
|                        | <b>15</b>   | <b>5.58</b> | <b>54</b>  | <b>-27</b> | <b>0</b>   | <b>Temporal_Sup_R</b>  |
|                        | <b>15</b>   | <b>5.51</b> | <b>21</b>  | <b>-69</b> | <b>-48</b> | <b>Cerebelum_8_R</b>   |
|                        | <b>114*</b> | <b>4.96</b> | <b>-15</b> | <b>6</b>   | <b>72</b>  | <b>Frontal_Sup_2_L</b> |
|                        | <b>6</b>    | <b>4.89</b> | <b>6</b>   | <b>-81</b> | <b>-3</b>  | <b>Lingual_R</b>       |

|            |              |            |            |            |                          |
|------------|--------------|------------|------------|------------|--------------------------|
|            | 4.71         | 12         | -78        | -9         | Lingual_R                |
| <b>114</b> | <b>4.71</b>  | <b>-9</b>  | <b>-63</b> | <b>-3</b>  | <b>Lingual_L</b>         |
|            | 4.50*        | -30        | 27         | -3         | Insula_L                 |
|            | 4.22*        | -30        | 21         | -9         | Insula_L                 |
| <b>20</b>  | <b>3.66*</b> | <b>-30</b> | <b>18</b>  | <b>-18</b> | <b>Insula_L</b>          |
|            | 4.40*        | -57        | -24        | 21         | SupraMarginal_L          |
| <b>55</b>  | <b>4.23*</b> | <b>-21</b> | <b>-78</b> | <b>-21</b> | <b>Cerebelum_6_L</b>     |
|            | 3.48*        | -36        | -72        | -24        | Cerebelum_Crus1_L        |
| <b>47</b>  | <b>4.20*</b> | <b>33</b>  | <b>24</b>  | <b>6</b>   | <b>Insula_R</b>          |
| <b>36</b>  | <b>4.01*</b> | <b>-51</b> | <b>24</b>  | <b>24</b>  | <b>Frontal_Inf_Tri_L</b> |
|            | 3.77*        | -42        | 24         | 21         | Frontal_Inf_Tri_L        |
| <b>51</b>  | <b>3.99*</b> | <b>-42</b> | <b>-60</b> | <b>-33</b> | <b>Cerebelum_Crus1_L</b> |
|            | 3.77*        | -48        | -63        | -39        | Cerebelum_Crus1_L        |
| <b>8</b>   | <b>3.62*</b> | <b>-6</b>  | <b>42</b>  | <b>12</b>  | <b>Cingulate_Ant_L</b>   |
| <b>17</b>  | <b>3.61*</b> | <b>60</b>  | <b>0</b>   | <b>-12</b> | <b>Temporal_Sup_R</b>    |
| <b>18</b>  | <b>3.56*</b> | <b>-42</b> | <b>-42</b> | <b>-15</b> | <b>Temporal_Inf_L</b>    |
| <b>6</b>   | <b>3.47*</b> | <b>21</b>  | <b>-27</b> | <b>24</b>  | <b>Caudate_R</b>         |
| <b>5</b>   | <b>3.45*</b> | <b>-33</b> | <b>42</b>  | <b>15</b>  | <b>Frontal_Mid_2_L</b>   |
| <b>11</b>  | <b>3.39*</b> | <b>-21</b> | <b>51</b>  | <b>27</b>  | <b>Frontal_Sup_2_L</b>   |
| <b>5</b>   | <b>3.34*</b> | <b>-24</b> | <b>-36</b> | <b>0</b>   | <b>Hippocampus_L</b>     |
| <b>6</b>   | <b>3.32*</b> | <b>-15</b> | <b>-93</b> | <b>-12</b> | <b>Lingual_L</b>         |
| <b>7</b>   | <b>3.32*</b> | <b>45</b>  | <b>-63</b> | <b>-30</b> | <b>Cerebelum_Crus1_R</b> |

**Table S12.** Activation differences between P1 and HC during GE (generation with implicit encoding) before surgery. For each peak, the number of voxels in the cluster (k), T value, x, y, z coordinates (in mm) and region label (AAL atlas, Tzourio-Mazoyer et al., 2002) and are presented. Activations were obtained at  $T > 3.61$  ( $p < 0.001$ , uncorrected). Regions in bold represent cluster peaks.

| Contrast          | k         | T           | x          | y          | z         | AAL                    |
|-------------------|-----------|-------------|------------|------------|-----------|------------------------|
| <b>HC &gt; P1</b> | <b>56</b> | <b>5.89</b> | <b>18</b>  | <b>-54</b> | <b>39</b> | <b>Precuneus_R</b>     |
| <b>P1 &gt; HC</b> | <b>9</b>  | <b>7.86</b> | <b>24</b>  | <b>-39</b> | <b>30</b> | <b>Cingulate_Mid_R</b> |
|                   |           | 4.51        | 60         | -24        | 36        | SupraMarginal_R        |
|                   | <b>9</b>  | <b>4.73</b> | <b>-27</b> | <b>-39</b> | <b>-3</b> | <b>Hippocampus_L</b>   |
|                   | <b>9</b>  | <b>4.63</b> | <b>33</b>  | <b>-54</b> | <b>12</b> | <b>Calcarine_R</b>     |
|                   | <b>5</b>  | <b>4.51</b> | <b>60</b>  | <b>-24</b> | <b>36</b> | <b>SupraMarginal_R</b> |
|                   | <b>5</b>  | <b>4.06</b> | <b>-39</b> | <b>-42</b> | <b>-9</b> | <b>Temporal_Inf_L</b>  |

**Table S13.** Activated regions for the contrast GE (generation with implicit encoding) vs. baseline in P1 after surgery. For each peak, the number of voxels in the cluster (k), T value, x, y, z coordinates (in mm) and region label (AAL atlas, Tzourio-Mazoyer et al., 2002) and are presented. Activations were obtained at  $T > 4.58$  ( $p < 0.05$ , FWE). Values marked with \* were obtained at  $T > 3.1$  ( $p < 0.001$ , uncorrected). Regions in bold represent cluster peaks.

| Contrast  | k         | T           | x          | y        | z         | AAL                        |
|-----------|-----------|-------------|------------|----------|-----------|----------------------------|
| <b>GE</b> | <b>79</b> | <b>6.81</b> | <b>-9</b>  | <b>9</b> | <b>72</b> | <b>Supp_Motor_Area_L</b>   |
|           | <b>57</b> | <b>5.78</b> | <b>-54</b> | <b>6</b> | <b>0</b>  | <b>Temporal_Pole_Sup_L</b> |



|                 |           |              |            |            |            |                           |
|-----------------|-----------|--------------|------------|------------|------------|---------------------------|
| vs.<br>baseline |           | 5.53         | -51        | 6          | 9          | Frontal_Inf_Oper_L        |
|                 |           | 4.10*        | -33        | 15         | 9          | Insula_L                  |
|                 | <b>57</b> | <b>5.77</b>  | <b>-54</b> | <b>-30</b> | <b>-6</b>  | <b>Temporal_Mid_L</b>     |
|                 |           | 5.26         | -54        | -21        | -15        | Temporal_Mid_L            |
|                 | <b>23</b> | <b>4.48*</b> | <b>-42</b> | <b>0</b>   | <b>57</b>  | <b>Precentral_L</b>       |
|                 | <b>13</b> | <b>4.48*</b> | <b>24</b>  | <b>-69</b> | <b>-51</b> | <b>Cerebellum_8_R</b>     |
|                 | <b>27</b> | <b>4.11*</b> | <b>-21</b> | <b>45</b>  | <b>27</b>  | <b>Frontal_Sup_2_L</b>    |
|                 | <b>33</b> | <b>4.02*</b> | <b>-48</b> | <b>6</b>   | <b>33</b>  | <b>Precentral_L</b>       |
|                 |           | 3.29*        | -33        | 3          | 33         | Precentral_L              |
|                 | <b>29</b> | <b>3.93*</b> | <b>-42</b> | <b>-45</b> | <b>-24</b> | <b>Fusiform_L</b>         |
|                 | <b>16</b> | <b>3.89*</b> | <b>-15</b> | <b>-99</b> | <b>9</b>   | <b>Occipital_Mid_L</b>    |
|                 | <b>10</b> | <b>3.60*</b> | <b>-18</b> | <b>-81</b> | <b>-21</b> | <b>Cerebellum_Crus1_L</b> |
|                 |           | 3.32*        | -27        | -75        | -21        | Cerebellum_6_L            |
|                 | <b>7</b>  | <b>3.42*</b> | <b>9</b>   | <b>18</b>  | <b>36</b>  | <b>Cingulate_Mid_R</b>    |

**Table S14.** Activation differences between P1 and HC during GE (generation with implicit encoding) after surgery. For each peak, the number of voxels in the cluster (k), T value, x, y, z coordinates (in mm) and region label (AAL atlas, Tzourio-Mazoyer et al., 2002) are presented. All activations were obtained at  $T > 3.61$  ( $p < 0.001$ , uncorrected). Regions in bold represent cluster peaks.

| Contrast | k         | T           | x          | y          | z          | AAL                   |
|----------|-----------|-------------|------------|------------|------------|-----------------------|
| HC > P1  | <b>14</b> | <b>5.88</b> | <b>12</b>  | <b>-57</b> | <b>51</b>  | <b>Precuneus_R</b>    |
|          | <b>18</b> | <b>5.08</b> | <b>-12</b> | <b>-63</b> | <b>45</b>  | <b>Precuneus_L</b>    |
|          | <b>7</b>  | <b>4.92</b> | <b>42</b>  | <b>-48</b> | <b>12</b>  | <b>Temporal_Mid_R</b> |
|          | <b>8</b>  | <b>4.76</b> | <b>-42</b> | <b>-39</b> | <b>9</b>   | <b>Temporal_Sup_L</b> |
|          | <b>22</b> | <b>4.47</b> | <b>-21</b> | <b>-48</b> | <b>48</b>  | <b>Parietal_Sup_L</b> |
|          | <b>6</b>  | <b>4.43</b> | <b>6</b>   | <b>-66</b> | <b>42</b>  | <b>Precuneus_R</b>    |
|          | <b>17</b> | <b>4.33</b> | <b>57</b>  | <b>-36</b> | <b>9</b>   | <b>Temporal_Sup_R</b> |
|          |           | 4.33        | 63         | -30        | 15         | Temporal_Sup_R        |
|          | <b>7</b>  | <b>4.19</b> | <b>-3</b>  | <b>-12</b> | <b>6</b>   | <b>Thalamus_L</b>     |
|          | <b>5</b>  | <b>3.86</b> | <b>18</b>  | <b>-45</b> | <b>60</b>  | <b>Parietal_Sup_R</b> |
| P1 > HC  | <b>25</b> | <b>5.53</b> | <b>-48</b> | <b>-33</b> | <b>-12</b> | <b>Temporal_Mid_L</b> |
|          |           | 4.42        | -51        | -24        | -15        | Temporal_Mid_L        |

**Table S15.** Activated regions for the contrast RECO (recognition) vs. baseline in P1 before surgery. For each peak, the number of voxels in the cluster (k), T value, x, y, z coordinates (in mm) and region label (AAL atlas, Tzourio-Mazoyer et al., 2002) are presented. Activations were obtained at  $T > 4.59$  ( $p < 0.05$ , FWE). T values marked with \* were obtained at  $T > 3.1$  ( $p < 0.001$ , uncorrected). Regions in bold represent cluster peaks.

| Contrast                | k          | T           | x          | y          | z               | AAL                    |
|-------------------------|------------|-------------|------------|------------|-----------------|------------------------|
| RECO<br>vs.<br>baseline | <b>628</b> | <b>8.57</b> | <b>36</b>  | <b>-87</b> | <b>6</b>        | <b>Occipital_Mid_R</b> |
|                         |            | 7.49        | 33         | -72        | -15             | Fusiform_R             |
|                         |            | 6.77        | 21         | -93        | -9              | Lingual_R              |
|                         | <b>640</b> | <b>8.51</b> | <b>-33</b> | <b>-81</b> | <b>-18</b>      | <b>Fusiform_L</b>      |
|                         |            | 8.48        | -30        | -54        | -21             | Cerebellum_6_L         |
|                         | 7.27       | -45         | -75        | -12        | Occipital_Inf_L |                        |

|            |              |            |            |            |                            |
|------------|--------------|------------|------------|------------|----------------------------|
| <b>184</b> | <b>7.79</b>  | <b>42</b>  | <b>-12</b> | <b>63</b>  | <b>Precentral_R</b>        |
|            | 6.21         | 18         | -6         | 72         | Frontal_Sup_2_R            |
|            | 6.18         | 45         | -24        | 60         | Precentral_R               |
| <b>93</b>  | <b>6.45</b>  | <b>-54</b> | <b>9</b>   | <b>36</b>  | <b>Precentral_L</b>        |
|            | 4.88         | -45        | 0          | 51         | Precentral_L               |
| <b>52</b>  | <b>6.39</b>  | <b>-30</b> | <b>-60</b> | <b>48</b>  | <b>Parietal_Inf_L</b>      |
| <b>83</b>  | <b>5.43</b>  | <b>-6</b>  | <b>6</b>   | <b>45</b>  | <b>Supp_Motor_Area_L</b>   |
|            | 5.41         | 6          | 9          | 45         | Supp_Motor_Area_R          |
|            | 5.02         | -3         | -3         | 54         | Supp_Motor_Area_L          |
| <b>274</b> | <b>6.39</b>  | <b>-30</b> | <b>-60</b> | <b>48</b>  | <b>Parietal_Inf_L</b>      |
|            | 4.50*        | -36        | -51        | 39         | Parietal_Inf_L             |
|            | 4.18*        | -39        | -39        | 36         | Parietal_Inf_L             |
| <b>187</b> | <b>4.55*</b> | <b>12</b>  | <b>-66</b> | <b>6</b>   | <b>Calcarine_R</b>         |
|            | 4.40*        | 24         | -63        | 3          | Calcarine_R                |
|            | 3.67*        | 6          | -75        | -6         | Lingual_R                  |
| <b>40</b>  | <b>4.54*</b> | <b>39</b>  | <b>3</b>   | <b>24</b>  | <b>Frontal_Inf_Oper_R</b>  |
| <b>117</b> | <b>4.40*</b> | <b>21</b>  | <b>-30</b> | <b>-3</b>  | <b>Hippocampus_R</b>       |
|            | 3.81*        | 9          | -21        | 3          | Thalamus_R                 |
|            | 3.80*        | 12         | -12        | 6          | Thalamus_R                 |
| <b>272</b> | <b>4.29*</b> | <b>-36</b> | <b>30</b>  | <b>-12</b> | <b>Frontal_Inf_Orb_2_L</b> |
|            | 4.24*        | -33        | 21         | 0          | Insula_L                   |
|            | 4.05*        | -30        | 18         | 9          | Insula_L                   |
| <b>10</b>  | <b>4.29*</b> | <b>-57</b> | <b>-21</b> | <b>42</b>  | <b>SupraMarginal_L</b>     |
| <b>14</b>  | <b>4.26*</b> | <b>66</b>  | <b>0</b>   | <b>18</b>  | <b>Postcentral_R</b>       |
| <b>41</b>  | <b>4.15*</b> | <b>21</b>  | <b>0</b>   | <b>-18</b> | <b>Amygdala_R</b>          |
|            | 3.37*        | 30         | 9          | -27        | Temporal_Pole_Sup_R        |
|            | 3.18*        | 18         | -6         | -9         | Hippocampus_R              |
| <b>55</b>  | <b>4.10*</b> | <b>-15</b> | <b>6</b>   | <b>-21</b> | <b>ParaHippocampal_L</b>   |
|            | 3.63*        | -18        | -6         | -21        | Hippocampus_L              |
| <b>12</b>  | <b>4.07*</b> | <b>-15</b> | <b>-3</b>  | <b>75</b>  | <b>Frontal_Sup_2_L</b>     |
| <b>10</b>  | <b>3.99*</b> | <b>15</b>  | <b>-75</b> | <b>-48</b> | <b>Cerebelum_8_R</b>       |
| <b>27</b>  | <b>3.75*</b> | <b>39</b>  | <b>15</b>  | <b>6</b>   | <b>Insula_R</b>            |
|            | 3.42*        | 30         | 24         | 0          | Insula_R                   |
| <b>16</b>  | <b>3.74*</b> | <b>-51</b> | <b>6</b>   | <b>-3</b>  | <b>Temporal_Pole_Sup_L</b> |
| <b>22</b>  | <b>3.42*</b> | <b>18</b>  | <b>6</b>   | <b>0</b>   | <b>Pallidum_R</b>          |
|            | 3.35*        | 27         | 0          | 3          | Putamen_R                  |
| <b>8</b>   | <b>3.35*</b> | <b>3</b>   | <b>30</b>  | <b>30</b>  | <b>Cingulate_Mid_R</b>     |

**Table S16.** Activation differences between P1 and HC during RECO (recognition) before surgery. For each peak, the number of voxels in the cluster (k), T value, x, y, z coordinates (in mm) and region label (AAL atlas, Tzourio-Mazoyer et al., 2002) are presented. All activations were obtained at  $T > 3.61$  ( $p < 0.001$ , uncorrected). Regions in bold represent cluster peaks.

| Contrast          | k         | T           | x          | y          | z          | AAL                      |
|-------------------|-----------|-------------|------------|------------|------------|--------------------------|
| <b>HC &gt; P1</b> | <b>30</b> | <b>4.92</b> | <b>-21</b> | <b>-42</b> | <b>21</b>  | <b>Cingulate_Post_L</b>  |
|                   | <b>10</b> | <b>4.50</b> | <b>9</b>   | <b>-48</b> | <b>-12</b> | <b>Cerebelum_4_5_R</b>   |
| <b>P1 &gt; HC</b> | <b>37</b> | <b>7.01</b> | <b>-18</b> | <b>-3</b>  | <b>-24</b> | <b>ParaHippocampal_L</b> |

|           |             |           |            |            |                            |
|-----------|-------------|-----------|------------|------------|----------------------------|
|           | 4.76        | -12       | -12        | -21        | Hippocampus_L              |
| <b>39</b> | <b>6.70</b> | <b>12</b> | <b>-6</b>  | <b>75</b>  | <b>Supp_Motor_Area_R</b>   |
|           | 4.53        | 24        | -15        | 72         | Precentral_R               |
|           | 3.80        | 12        | 6          | 72         | Supp_Motor_Area_R          |
| <b>17</b> | <b>5.85</b> | <b>33</b> | <b>3</b>   | <b>-24</b> | <b>Temporal_Pole_Sup_R</b> |
| <b>11</b> | <b>5.38</b> | <b>63</b> | <b>0</b>   | <b>18</b>  | <b>Postcentral_R</b>       |
| <b>70</b> | <b>5.24</b> | <b>45</b> | <b>-12</b> | <b>51</b>  | <b>Precentral_R</b>        |
|           | 5.08        | 45        | -24        | 54         | Postcentral_R              |
| <b>14</b> | <b>4.74</b> | <b>24</b> | <b>-36</b> | <b>0</b>   | <b>Hippocampus_R</b>       |
| <b>50</b> | <b>4.46</b> | <b>-9</b> | <b>-30</b> | <b>6</b>   | <b>Thalamus_L</b>          |
|           | 4.41        | 12        | -24        | 3          | Thalamus_R                 |
|           | 4.26        | 3         | -30        | 12         | Thalamus_R                 |
| <b>5</b>  | <b>4.17</b> | <b>3</b>  | <b>-6</b>  | <b>18</b>  | <b>Thalamus_R</b>          |
| <b>5</b>  | <b>3.76</b> | <b>39</b> | <b>12</b>  | <b>6</b>   | <b>Insula_R</b>            |

**Table S17.** Activated regions for the contrast RECO (recognition) vs. baseline in P1 after surgery. For each peak, the number of voxels in the cluster (k), T value, x, y, z coordinates (in mm) and region label (AAL atlas, Tzourio-Mazoyer et al., 2002) are presented. Activations were obtained at  $T > 4.58$  ( $p < 0.05$ , FWE). T values marked with \* were obtained at  $T > 3.1$  ( $p < 0.001$ , uncorrected). Regions in bold represent cluster peaks.

| Contrast                 | k          | T            | x          | y          | z          | AAL                      |
|--------------------------|------------|--------------|------------|------------|------------|--------------------------|
| <b>RECO vs. baseline</b> | <b>158</b> | <b>6.16</b>  | <b>-18</b> | <b>-90</b> | <b>3</b>   | <b>Occipital_Sup_L</b>   |
|                          |            | 6.13         | -27        | -87        | 9          | Occipital_Mid_L          |
|                          |            | 5.62         | -24        | -93        | 15         | Occipital_Mid_L          |
|                          | <b>107</b> | <b>6.05</b>  | <b>27</b>  | <b>-81</b> | <b>-9</b>  | <b>Fusiform_R</b>        |
|                          |            | 5.94         | 21         | -93        | 15         | Occipital_Sup_R          |
|                          |            | 4.83         | 15         | -96        | 3          | Calcarine_R              |
|                          | <b>70</b>  | <b>5.65</b>  | <b>-36</b> | <b>-78</b> | <b>-12</b> | <b>Occipital_Inf_L</b>   |
|                          |            | 4.99         | -36        | -60        | -24        | Cerebelum_6_L            |
|                          |            | 4.59         | -30        | -72        | -9         | Fusiform_L               |
|                          | <b>5</b>   | <b>4.80</b>  | <b>-39</b> | <b>0</b>   | <b>33</b>  | <b>Precentral_L</b>      |
|                          | <b>47</b>  | <b>4.79</b>  | <b>-30</b> | <b>-63</b> | <b>45</b>  | <b>Parietal_Sup_L</b>    |
|                          | <b>66</b>  | <b>4.24*</b> | <b>-3</b>  | <b>-6</b>  | <b>57</b>  | <b>Supp_Motor_Area_L</b> |
|                          |            | 3.33*        | -3         | 3          | 48         | Supp_Motor_Area_L        |
|                          | <b>7</b>   | <b>3.84*</b> | <b>15</b>  | <b>-90</b> | <b>33</b>  | <b>Cuneus_R</b>          |
|                          | <b>15</b>  | <b>3.64*</b> | <b>15</b>  | <b>-6</b>  | <b>69</b>  | <b>Supp_Motor_Area_R</b> |
|                          | <b>10</b>  | <b>3.59*</b> | <b>-42</b> | <b>-18</b> | <b>45</b>  | <b>Postcentral_L</b>     |
|                          | <b>12</b>  | <b>3.56*</b> | <b>-39</b> | <b>-15</b> | <b>57</b>  | <b>Precentral_L</b>      |

**Table S18.** Activation differences between P1 and HC during RECO (recognition) after surgery. For each peak, the number of voxels in the cluster (k), T value, x, y, z coordinates (in mm) and region label (AAL atlas, Tzourio-Mazoyer et al., 2002) are presented. All activations were obtained at  $T > 3.61$  ( $p < 0.001$ , uncorrected). Regions in bold represent cluster peaks.

| Contrast          | k          | T           | x         | y          | z         | AAL                   |
|-------------------|------------|-------------|-----------|------------|-----------|-----------------------|
| <b>HC &gt; P1</b> | <b>277</b> | <b>9.59</b> | <b>36</b> | <b>-45</b> | <b>15</b> | <b>Temporal_Mid_R</b> |
|                   |            | 6.80        | 21        | -42        | 24        | Precuneus_R           |

|                   |           |                            |            |            |            |                             |
|-------------------|-----------|----------------------------|------------|------------|------------|-----------------------------|
|                   |           | 6.74                       | 39         | -39        | 21         | Temporal_Sup_R              |
|                   | <b>58</b> | <b>7.10</b>                | <b>-24</b> | <b>-54</b> | <b>21</b>  | <b>Cuneus_L</b>             |
|                   |           | 5.43                       | -15        | -48        | 21         | Cingulate_Post_L            |
|                   | <b>20</b> | <b>6.05</b>                | <b>-27</b> | <b>-6</b>  | <b>-21</b> | <b>Hippocampus_L</b>        |
|                   | <b>9</b>  | <b>5.60</b>                | <b>-42</b> | <b>-69</b> | <b>42</b>  | <b>Angular_L</b>            |
|                   | <b>8</b>  | <b>5.44</b>                | <b>-9</b>  | <b>24</b>  | <b>60</b>  | <b>Supp_Motor_Area_L</b>    |
|                   | <b>7</b>  | <b>5.43</b>                | <b>-54</b> | <b>-12</b> | <b>-6</b>  | <b>Temporal_Sup_L</b>       |
|                   | <b>10</b> | <b>5.26</b>                | <b>27</b>  | <b>-75</b> | <b>48</b>  | <b>Parietal_Sup_R</b>       |
|                   | <b>29</b> | <b>5.20</b>                | <b>45</b>  | <b>-9</b>  | <b>-12</b> | <b>Temporal_Sup_R</b>       |
|                   |           | 4.31                       | 60         | -6         | -21        | Temporal_Mid_R              |
|                   |           | 4.04                       | 54         | -12        | -18        | Temporal_Mid_R              |
|                   | <b>13</b> | <b>5.14</b>                | <b>-42</b> | <b>-42</b> | <b>0</b>   | <b>Temporal_Mid_L</b>       |
|                   | <b>17</b> | <b>5.11</b>                | <b>12</b>  | <b>30</b>  | <b>54</b>  | <b>Frontal_Sup_Medial_R</b> |
|                   | <b>23</b> | <b>5.04</b>                | <b>-60</b> | <b>-57</b> | <b>3</b>   | <b>Temporal_Mid_L</b>       |
|                   | <b>19</b> | <b>5.02</b>                | <b>-42</b> | <b>-18</b> | <b>-15</b> | <b>Temporal_Inf_L</b>       |
|                   | <b>20</b> | <b>5.01</b>                | <b>3</b>   | <b>9</b>   | <b>24</b>  | <b>Cingulate_Ant_R</b>      |
|                   | <b>13</b> | <b>4.93</b>                | <b>-39</b> | <b>-57</b> | <b>3</b>   | <b>Occipital_Mid_L</b>      |
|                   |           | 3.89                       | -36        | -69        | 9          | Occipital_Mid_L             |
|                   | <b>20</b> | <b>4.65</b>                | <b>-24</b> | <b>30</b>  | <b>48</b>  | <b>Frontal_Sup_2_L</b>      |
|                   | <b>8</b>  | <b>4.54</b>                | <b>-66</b> | <b>-27</b> | <b>3</b>   | <b>Temporal_Mid_L</b>       |
|                   | <b>8</b>  | <b>4.33</b>                | <b>-39</b> | <b>-51</b> | <b>24</b>  | <b>Angular_L</b>            |
|                   | <b>7</b>  | <b>4.28</b>                | <b>12</b>  | <b>45</b>  | <b>-3</b>  | <b>Frontal_Med_Orb_R</b>    |
|                   | <b>6</b>  | <b>4.10</b>                | <b>18</b>  | <b>-48</b> | <b>39</b>  | <b>Precuneus_R</b>          |
| <b>P1 &gt; HC</b> |           | No suprathreshold clusters |            |            |            |                             |

**Table S19.** Activated regions for the contrast RA (sentence recall) vs. baseline in P1 before surgery. For each peak, the number of voxels in the cluster (k), T value, x, y, z coordinates (in mm) and region label (AAL atlas, Tzourio-Mazoyer et al., 2002) are presented. Activations were obtained at  $T > 4.59$  ( $p < 0.05$ , FWE). T values marked with \* were obtained at  $T > 3.1$  ( $p < 0.001$ , uncorrected). Regions in bold represent cluster peaks.

| Contrast               | k          | T           | x          | y          | z          | AAL                      |
|------------------------|------------|-------------|------------|------------|------------|--------------------------|
| <b>RA vs. baseline</b> | <b>396</b> | <b>7.15</b> | <b>15</b>  | <b>-78</b> | <b>-18</b> | <b>Cerebelum_6_R</b>     |
|                        |            | 5.91        | 27         | -63        | -24        | Cerebelum_6_R            |
|                        |            | 5.65        | 6          | -84        | -6         | Lingual_R                |
|                        | <b>81</b>  | <b>6.78</b> | <b>-60</b> | <b>9</b>   | <b>0</b>   | <b>Rolandic_Oper_L</b>   |
|                        |            | 5.28        | -51        | 6          | 12         | Frontal_Inf_Oper_L       |
|                        | <b>54</b>  | <b>5.80</b> | <b>-39</b> | <b>-60</b> | <b>-33</b> | <b>Cerebelum_Crus1_L</b> |
|                        |            | 4.98        | -24        | -60        | -24        | Cerebelum_6_L            |
|                        | <b>92</b>  | <b>5.64</b> | <b>-57</b> | <b>-15</b> | <b>-3</b>  | <b>Temporal_Mid_L</b>    |
|                        |            | 5.44        | 18         | -72        | -45        | Cerebelum_8_R            |
|                        | <b>33</b>  | <b>5.43</b> | <b>-15</b> | <b>6</b>   | <b>72</b>  | <b>Frontal_Sup_2_L</b>   |
|                        | <b>13</b>  | <b>4.83</b> | <b>0</b>   | <b>6</b>   | <b>57</b>  | <b>Supp_Motor_Area_L</b> |
|                        |            | 4.78        | -54        | -54        | -6         | Temporal_Inf_L           |
|                        | <b>6</b>   | <b>4.73</b> | <b>-36</b> | <b>48</b>  | <b>18</b>  | <b>Frontal_Mid_2_L</b>   |
|                        | <b>5</b>   | <b>4.97</b> | <b>-57</b> | <b>-24</b> | <b>21</b>  | <b>SupraMarginal_L</b>   |
|                        | <b>39</b>  | <b>4.88</b> | <b>63</b>  | <b>-12</b> | <b>-3</b>  | <b>Temporal_Sup_R</b>    |

|            |              |            |            |            |                            |
|------------|--------------|------------|------------|------------|----------------------------|
| <b>181</b> | <b>4.13*</b> | <b>60</b>  | <b>3</b>   | <b>-12</b> | <b>Temporal_Pole_Sup_R</b> |
|            | 3.92*        | 54         | -18        | -3         | Temporal_Sup_R             |
|            | 4.73*        | -36        | 48         | 18         | Frontal_Mid_2_L            |
| <b>198</b> | <b>4.51*</b> | <b>-51</b> | <b>36</b>  | <b>12</b>  | <b>Frontal_Inf_Tri_L</b>   |
|            | 4.67*        | -33        | 18         | 12         | Insula_L                   |
|            | 3.58*        | -21        | 18         | -3         | Putamen_L                  |
| <b>65</b>  | <b>4.16*</b> | <b>-24</b> | <b>-75</b> | <b>-51</b> | <b>Cerebelum_7b_L</b>      |
|            | 3.93*        | -39        | -54        | -54        | Cerebelum_8_L              |
|            | 4.10*        | 51         | 0          | 51         | Frontal_Mid_2_R            |
| <b>56</b>  | <b>4.07*</b> | <b>-18</b> | <b>-69</b> | <b>57</b>  | <b>Parietal_Sup_L</b>      |
|            | 3.99*        | -24        | -72        | 51         | Parietal_Sup_L             |
| <b>14</b>  | <b>3.70*</b> | <b>39</b>  | <b>42</b>  | <b>30</b>  | <b>Frontal_Mid_2_R</b>     |
| <b>89</b>  | <b>3.66*</b> | <b>39</b>  | <b>48</b>  | <b>21</b>  | <b>Frontal_Mid_2_R</b>     |
|            | 3.70*        | -60        | -48        | 12         | Temporal_Sup_L             |
| <b>39</b>  | <b>3.66*</b> | <b>27</b>  | <b>-39</b> | <b>-39</b> | <b>Cerebelum_10_R</b>      |
|            | 3.59*        | 39         | 18         | 6          | Insula_R                   |
| <b>7</b>   | <b>3.32*</b> | <b>30</b>  | <b>9</b>   | <b>9</b>   | <b>Putamen_R</b>           |

**Table S20.** Activation differences between P1 and HC during RA (sentence recall) before surgery. For each peak, the number of voxels in the cluster (k), T value, x, y, z coordinates (in mm) and region label (AAL atlas, Tzourio-Mazoyer et al., 2002) are presented. All activations were obtained at  $T > 3.61$  ( $p < 0.001$ , uncorrected). Regions in bold represent cluster peaks.

| Contrast          | k         | T           | x                          | y          | z          | AAL                      |
|-------------------|-----------|-------------|----------------------------|------------|------------|--------------------------|
| <b>HC &gt; P1</b> |           |             | No suprathreshold clusters |            |            |                          |
| <b>P1 &gt; HC</b> | <b>78</b> | <b>7.15</b> | <b>24</b>                  | <b>-51</b> | <b>42</b>  | <b>Angular_R</b>         |
|                   |           | 5.14        | 27                         | -51        | 51         | Parietal_Inf_R           |
|                   |           | 4.83        | 21                         | -39        | 39         | Cingulate_Mid_R          |
|                   | <b>39</b> | <b>5.62</b> | <b>-24</b>                 | <b>-60</b> | <b>6</b>   | <b>Calcarine_L</b>       |
|                   |           | 4.57        | -15                        | -63        | 6          | Calcarine_L              |
|                   | <b>14</b> | <b>5.39</b> | <b>-57</b>                 | <b>-57</b> | <b>-9</b>  | <b>Temporal_Inf_L</b>    |
|                   | <b>23</b> | <b>5.10</b> | <b>-12</b>                 | <b>-60</b> | <b>-18</b> | <b>Cerebelum_6_L</b>     |
|                   | <b>9</b>  | <b>4.84</b> | <b>-39</b>                 | <b>-69</b> | <b>-33</b> | <b>Cerebelum_Curs1_L</b> |
|                   | <b>30</b> | <b>4.67</b> | <b>9</b>                   | <b>-66</b> | <b>-18</b> | <b>Cerebelum_6_R</b>     |
|                   |           | 4.49        | 0                          | -66        | -15        | Vermis_6                 |
|                   | <b>6</b>  | <b>4.57</b> | <b>36</b>                  | <b>-42</b> | <b>-12</b> | <b>Fusiform_R</b>        |
|                   | <b>19</b> | <b>4.31</b> | <b>24</b>                  | <b>-75</b> | <b>27</b>  | <b>Occipital_Sup_R</b>   |
|                   | <b>5</b>  | <b>4.17</b> | <b>9</b>                   | <b>-81</b> | <b>-24</b> | <b>Cerebelum_Crus1_R</b> |

**Table S21.** Activated regions for the contrast RA (sentence recall) vs. baseline in P1 after surgery. For each peak, the number of voxels in the cluster (k), T value, x, y, z coordinates (in mm) and region label (AAL atlas, Tzourio-Mazoyer et al., 2002) are presented. Activations were obtained at  $T > 4.58$  ( $p < 0.05$ , FWE). T values marked with \* were obtained at  $T > 3.1$  ( $p < 0.001$ , uncorrected). Regions in bold represent cluster peaks.

| Contrast  | k          | T           | x          | y          | z        | AAL                    |
|-----------|------------|-------------|------------|------------|----------|------------------------|
| <b>RA</b> | <b>440</b> | <b>9.13</b> | <b>-18</b> | <b>-96</b> | <b>6</b> | <b>Occipital_Mid_L</b> |

|                 |            |              |            |            |            |                            |
|-----------------|------------|--------------|------------|------------|------------|----------------------------|
| vs.<br>baseline |            | 8.96         | -12        | -96        | 18         | Occipital_Sup_L            |
|                 |            | 7.22         | -9         | -93        | -6         | Calcarine_L                |
|                 | <b>275</b> | <b>8.23</b>  | <b>21</b>  | <b>-93</b> | <b>15</b>  | <b>Occipital_Sup_R</b>     |
|                 |            | 7.52         | 12         | -90        | -6         | Lingual_R                  |
|                 |            | 5.58         | 36         | -63        | -27        | Cerebelum_6_R              |
|                 | <b>399</b> | <b>8.07</b>  | <b>-42</b> | <b>3</b>   | <b>51</b>  | <b>Frontal_Mid_2_L</b>     |
|                 |            | 7.64         | -6         | 12         | 72         | Supp_Motor_Area_L          |
|                 |            | 6.44         | 0          | 6          | 54         | Supp_Motor_Area_L          |
|                 | <b>121</b> | <b>7.92</b>  | <b>-54</b> | <b>-30</b> | <b>-3</b>  | <b>Temporal_Mid_L</b>      |
|                 | <b>88</b>  | <b>6.79</b>  | <b>12</b>  | <b>-72</b> | <b>6</b>   | <b>Calcarine_R</b>         |
|                 | <b>43</b>  | <b>6.06</b>  | <b>-54</b> | <b>6</b>   | <b>15</b>  | <b>Precentral_L</b>        |
|                 |            | 5.28         | -54        | 6          | 3          | Rolandic_Oper_L            |
|                 | <b>29</b>  | <b>5.54</b>  | <b>-21</b> | <b>-60</b> | <b>3</b>   | <b>Calcarine_L</b>         |
|                 | <b>70</b>  | <b>5.48</b>  | <b>-51</b> | <b>21</b>  | <b>18</b>  | <b>Frontal_Inf_Tri_L</b>   |
|                 |            | 5.45         | -39        | 42         | 15         | Frontal_Mid_2_L            |
|                 | <b>20</b>  | <b>5.42</b>  | <b>-21</b> | <b>45</b>  | <b>27</b>  | <b>Frontal_Sup_2_L</b>     |
|                 | <b>6</b>   | <b>5.38</b>  | <b>-27</b> | <b>27</b>  | <b>-3</b>  | <b>Insula_L</b>            |
|                 | <b>6</b>   | <b>5.04</b>  | <b>-45</b> | <b>-42</b> | <b>-15</b> | <b>Temporal_Inf_L</b>      |
|                 | <b>9</b>   | <b>4.50*</b> | <b>54</b>  | <b>15</b>  | <b>-18</b> | <b>Temporal_Pole_Sup_R</b> |
|                 | <b>16</b>  | <b>3.97*</b> | <b>21</b>  | <b>-72</b> | <b>-51</b> | <b>Cerebelum_8_R</b>       |
|                 | <b>10</b>  | <b>3.95*</b> | <b>12</b>  | <b>21</b>  | <b>30</b>  | <b>Cingulate_Mid_R</b>     |
|                 | <b>7</b>   | <b>3.78*</b> | <b>-12</b> | <b>63</b>  | <b>-3</b>  | <b>Frontal_Med_Orb_L</b>   |
|                 | <b>14</b>  | <b>3.68*</b> | <b>-24</b> | <b>9</b>   | <b>9</b>   | <b>Putamen_L</b>           |
|                 | <b>5</b>   | <b>3.33*</b> | <b>0</b>   | <b>-72</b> | <b>51</b>  | <b>Precuneus_L</b>         |

**Table S22.** Activation differences between P1 and HC during RA (sentence recall) after surgery. For each peak, the number of voxels in the cluster (k), T value, x, y, z coordinates (in mm) and region label (AAL atlas, Tzourio-Mazoyer et al., 2002) are presented. All activations were obtained at  $T > 3.61$  ( $p < 0.001$ , uncorrected). Regions in bold represent cluster peaks.

| Contrast          | k          | T           | x          | y          | z          | AAL                    |
|-------------------|------------|-------------|------------|------------|------------|------------------------|
| <b>HC &gt; P1</b> | <b>24</b>  | <b>6.16</b> | <b>-24</b> | <b>-33</b> | <b>60</b>  | <b>Postcentral_L</b>   |
|                   | <b>9</b>   | <b>5.07</b> | <b>-48</b> | <b>-3</b>  | <b>-15</b> | <b>Temporal_Sup_L</b>  |
|                   | <b>7</b>   | <b>4.24</b> | <b>48</b>  | <b>-33</b> | <b>45</b>  | <b>SupraMarginal_R</b> |
|                   | <b>5</b>   | <b>4.15</b> | <b>24</b>  | <b>-48</b> | <b>36</b>  | <b>Angular_R</b>       |
|                   | <b>6</b>   | <b>4.06</b> | <b>36</b>  | <b>-27</b> | <b>57</b>  | <b>Precentral_R</b>    |
| <b>P1 &gt; HC</b> | <b>116</b> | <b>7.75</b> | <b>-12</b> | <b>-93</b> | <b>18</b>  | <b>Occipital_Sup_L</b> |
|                   |            | 5.89        | -12        | -87        | 30         | Cuneus_L               |
|                   |            | 5.13        | -21        | -78        | 18         | Occipital_Mid_L        |
|                   | <b>25</b>  | <b>6.25</b> | <b>-24</b> | <b>-60</b> | <b>6</b>   | <b>Calcarine_L</b>     |
|                   | <b>34</b>  | <b>5.07</b> | <b>12</b>  | <b>-72</b> | <b>9</b>   | <b>Calcarine_R</b>     |
|                   | <b>25</b>  | <b>4.55</b> | <b>21</b>  | <b>-81</b> | <b>30</b>  | <b>Occipital_Sup_R</b> |
|                   | <b>5</b>   | <b>4.35</b> | <b>15</b>  | <b>-90</b> | <b>18</b>  | <b>Cuneus_R</b>        |
|                   | <b>17</b>  | <b>4.33</b> | <b>-60</b> | <b>-21</b> | <b>-12</b> | <b>Temporal_Mid_L</b>  |
|                   |            | 4.17        | -51        | -24        | -15        | Temporal_Mid_L         |
|                   |            | 3.93        | -45        | -33        | -9         | Temporal_Mid_L         |

**Table S23.** Activated regions for the contrast GE (generation with implicit encoding) vs. baseline in P2 before surgery. For each peak, the number of voxels in the cluster (k), T value, x, y, z coordinates (in mm) and region label (AAL atlas, Tzourio-Mazoyer et al., 2002) are presented. Activations were obtained at  $T > 4.64$  ( $p < 0.05$ , FWE). T values marked with \* were obtained at  $T > 3.1$  ( $p < 0.001$ , uncorrected). Regions in bold represent cluster peaks.

| Contrast        | k          | T            | x          | y          | z         | AAL                         |                   |
|-----------------|------------|--------------|------------|------------|-----------|-----------------------------|-------------------|
| GE vs. baseline | <b>336</b> | <b>7.84</b>  | <b>-3</b>  | <b>12</b>  | <b>66</b> | <b>Supp_Motor_Area_L</b>    |                   |
|                 |            | 7.25         | -3         | 18         | 42        | Frontal_Sup_Medial_L        |                   |
|                 |            | 6.06         | 0          | 15         | 51        | Supp_Motor_Area_L           |                   |
|                 |            |              | 6.16       | -3         | 21        | 36                          | Cingulate_Mid_L   |
|                 | <b>240</b> | <b>7.44</b>  | <b>-51</b> | <b>12</b>  | <b>-3</b> | <b>Temporal_Pole_Sup_L</b>  |                   |
|                 |            | 6.20         | -36        | 18         | -9        | Insula_L                    |                   |
|                 |            | 5.86         | -48        | 24         | -9        | Frontal_Inf_Orb_2_L         |                   |
|                 |            |              | 6.41       | -51        | 15        | 6                           | Frontal_Inf_Tri_L |
|                 | <b>151</b> | <b>6.94</b>  | <b>12</b>  | <b>-93</b> | <b>9</b>  | <b>Calcarine_R</b>          |                   |
|                 |            | 5.36         | 12         | -99        | -9        | Lingual_R                   |                   |
|                 |            | 4.44*        | 33         | -75        | -15       | Fusiform_R                  |                   |
|                 | <b>92</b>  | <b>6.81</b>  | <b>-45</b> | <b>6</b>   | <b>51</b> | <b>Frontal_Mid_2_L</b>      |                   |
|                 |            | 6.27         | -48        | 6          | 39        | Precentral_L                |                   |
|                 | <b>135</b> | <b>6.72</b>  | <b>-36</b> | <b>39</b>  | <b>30</b> | <b>Frontal_Mid_2_L</b>      |                   |
|                 |            | 5.91         | -33        | 51         | 15        | Frontal_Mid_2_L             |                   |
|                 |            | 5.20         | -21        | 63         | 3         | Frontal_Sup_2_L             |                   |
|                 | <b>34</b>  | <b>6.51</b>  | <b>-66</b> | <b>-36</b> | <b>3</b>  | <b>Temporal_Mid_L</b>       |                   |
|                 |            | 5.18         | -63        | -42        | 24        | SupraMarginal_L             |                   |
|                 | <b>14</b>  | <b>5.97</b>  | <b>-66</b> | <b>-42</b> | <b>21</b> | <b>Temporal_Sup_L</b>       |                   |
|                 | <b>85</b>  | <b>5.75</b>  | <b>-21</b> | <b>-96</b> | <b>9</b>  | <b>Occipital_Mid_L</b>      |                   |
|                 |            | 5.57         | -27        | -93        | 3         | Occipital_Mid_L             |                   |
|                 |            | 5.47         | -42        | -84        | -9        | Occipital_Inf_L             |                   |
|                 | <b>14</b>  | <b>5.51</b>  | <b>42</b>  | <b>-81</b> | <b>-9</b> | <b>Occipital_Inf_R</b>      |                   |
|                 | <b>6</b>   | <b>5.38</b>  | <b>39</b>  | <b>45</b>  | <b>27</b> | <b>Frontal_Mid_2_R</b>      |                   |
|                 | <b>7</b>   | <b>5.24</b>  | <b>57</b>  | <b>-24</b> | <b>-3</b> | <b>Temporal_Sup_R</b>       |                   |
|                 | <b>6</b>   | <b>5.14</b>  | <b>-63</b> | <b>-21</b> | <b>9</b>  | <b>Temporal_Sup_L</b>       |                   |
|                 | <b>8</b>   | <b>5.00</b>  | <b>-3</b>  | <b>48</b>  | <b>42</b> | <b>Frontal_Sup_Medial_L</b> |                   |
|                 |            | 4.68         | -27        | -93        | -12       | Occipital_Inf_L             |                   |
|                 | <b>42</b>  | <b>4.27*</b> | <b>24</b>  | <b>-63</b> | <b>63</b> | <b>Parietal_Sup_R</b>       |                   |
|                 | <b>60</b>  | <b>4.25*</b> | <b>42</b>  | <b>27</b>  | <b>-3</b> | <b>Frontal_Inf_Orb_2_R</b>  |                   |
|                 |            | 3.30*        | 45         | 15         | -9        | Insula_R                    |                   |
|                 |            | 3.21*        | 54         | 21         | -3        | Frontal_Inf_Tri_R           |                   |
|                 | <b>6</b>   | <b>3.58*</b> | <b>-18</b> | <b>-72</b> | <b>54</b> | <b>Parietal_Sup_L</b>       |                   |

**Table S24.** Activation differences between P2 and HC during GE (generation with implicit encoding) before surgery. For each peak, the number of voxels in the cluster (k), T value, x, y, z coordinates (in mm) and region label (AAL atlas, Tzourio-Mazoyer et al., 2002) are presented. All activations were obtained at  $T > 3.61$  ( $p < 0.001$ , uncorrected). Regions in bold represent cluster peaks.

| Contrast          | k         | T            | x          | y          | z          | AAL                      |
|-------------------|-----------|--------------|------------|------------|------------|--------------------------|
| <b>HC &gt; P2</b> | <b>73</b> | <b>10.50</b> | <b>3</b>   | <b>-42</b> | <b>12</b>  | <b>Cingulate_Post_R</b>  |
|                   | <b>36</b> | <b>5.80</b>  | <b>-18</b> | <b>6</b>   | <b>24</b>  | <b>Caudate_L</b>         |
|                   | <b>5</b>  | <b>4.70</b>  | <b>-3</b>  | <b>-12</b> | <b>3</b>   | <b>Thalamus_L</b>        |
|                   | <b>15</b> | <b>4.66</b>  | <b>-15</b> | <b>-87</b> | <b>-3</b>  | <b>Lingual_L</b>         |
|                   |           | 3.81         | -18        | -78        | -6         | Lingual_L                |
|                   | <b>21</b> | <b>4.38</b>  | <b>-9</b>  | <b>-63</b> | <b>-3</b>  | <b>Lingual_L</b>         |
|                   |           | 4.01         | -15        | -54        | -9         | Lingual_L                |
|                   | <b>6</b>  | <b>4.25</b>  | <b>-27</b> | <b>-42</b> | <b>-27</b> | <b>Cerebellum_4_5_L</b>  |
|                   | <b>8</b>  | <b>4.24</b>  | <b>9</b>   | <b>-36</b> | <b>48</b>  | <b>Cingulate_Mid_R</b>   |
| <b>P2 &gt; HC</b> | <b>19</b> | <b>8.87</b>  | <b>-39</b> | <b>-84</b> | <b>-6</b>  | <b>Occipital_Inf_L</b>   |
|                   | <b>13</b> | <b>5.67</b>  | <b>-36</b> | <b>18</b>  | <b>-9</b>  | <b>Insula_L</b>          |
|                   | <b>6</b>  | <b>5.36</b>  | <b>63</b>  | <b>-3</b>  | <b>27</b>  | <b>Postcentral_R</b>     |
|                   | <b>5</b>  | <b>4.79</b>  | <b>39</b>  | <b>45</b>  | <b>30</b>  | <b>Frontal_Mid_2_R</b>   |
|                   | <b>7</b>  | <b>4.78</b>  | <b>-24</b> | <b>60</b>  | <b>6</b>   | <b>Frontal_Sup_2_L</b>   |
|                   | <b>13</b> | <b>4.25</b>  | <b>39</b>  | <b>-69</b> | <b>-9</b>  | <b>Occipital_Inf_R</b>   |
|                   | <b>8</b>  | <b>4.21</b>  | <b>-36</b> | <b>39</b>  | <b>27</b>  | <b>Frontal_Mid_2_L</b>   |
|                   | <b>7</b>  | <b>4.11</b>  | <b>3</b>   | <b>42</b>  | <b>39</b>  | <b>Frontal_Sup_Med_L</b> |

**Table S25.** Activated regions for the contrast GE (generation with implicit encoding) vs. baseline in P2 after surgery. For each peak, the number of voxels in the cluster (k), T value, x, y, z coordinates (in mm) and region label (AAL atlas, Tzourio-Mazoyer et al., 2002) are presented. Activations were obtained at  $T > 4.65$  ( $p < 0.05$ , FWE). T values marked with \* were obtained at  $T > 3.1$  ( $p < 0.001$ , uncorrected). Regions in bold represent cluster peaks.

| Contrast               | k          | T           | x          | y          | z         | AAL                       |
|------------------------|------------|-------------|------------|------------|-----------|---------------------------|
| <b>GE vs. baseline</b> | <b>128</b> | <b>8.64</b> | <b>-3</b>  | <b>9</b>   | <b>69</b> | <b>Supp_Motor_Area_L</b>  |
|                        |            | 6.26        | 0          | 18         | 42        | Frontal_Sup_Medial_L      |
|                        |            | 5.28        | 6          | 27         | 33        | Cingulate_Mid_R           |
|                        | <b>40</b>  | <b>7.76</b> | <b>-12</b> | <b>-99</b> | <b>15</b> | <b>Occipital_Sup_L</b>    |
|                        |            | 6.65        | -12        | -102       | 6         | Occipital_Mid_L           |
|                        | <b>128</b> | <b>7.23</b> | <b>36</b>  | <b>57</b>  | <b>12</b> | <b>Frontal_Sup_2_R</b>    |
|                        |            | 6.38        | 36         | 45         | 30        | Frontal_Mid_2_R           |
|                        |            | 5.41        | 33         | 54         | 24        | Frontal_Sup_2_R           |
|                        | <b>65</b>  | <b>7.07</b> | <b>-63</b> | <b>-36</b> | <b>3</b>  | <b>Temporal_Mid_L</b>     |
|                        |            | 6.76        | -63        | -24        | 6         | Temporal_Sup_L            |
|                        | <b>65</b>  | <b>6.95</b> | <b>-48</b> | <b>15</b>  | <b>9</b>  | <b>Frontal_Inf_Oper_L</b> |
|                        |            | 5.08        | -48        | 24         | -6        | Frontal_Inf_Orb_2_L       |
|                        |            | 4.96        | -54        | 18         | 9         | Frontal_Inf_Tri_L         |
|                        | <b>84</b>  | <b>6.58</b> | <b>-33</b> | <b>33</b>  | <b>30</b> | <b>Frontal_Mid_2_L</b>    |
|                        |            | 5.99        | -33        | 45         | 27        | Frontal_Mid_2_L           |



|    |              |            |            |            |                             |
|----|--------------|------------|------------|------------|-----------------------------|
| 36 | <b>6.56</b>  | <b>-48</b> | <b>3</b>   | <b>42</b>  | <b>Precentral_L</b>         |
| 88 | <b>6.26</b>  | <b>0</b>   | <b>18</b>  | <b>42</b>  | <b>Frontal_Sup_Medial_L</b> |
|    | 5.28         | 6          | 27         | 33         | Cingulate_Mid_R             |
| 60 | <b>5.60</b>  | <b>39</b>  | <b>27</b>  | <b>3</b>   | <b>Insula_R</b>             |
|    | 4.49*        | 57         | 24         | 6          | Frontal_Inf_Tri_R           |
|    | 4.55*        | 54         | 21         | -6         | Frontal_Inf_Orb_2_R         |
|    | 3.57*        | 42         | 15         | 3          | Frontal_Inf_Oper_R          |
| 11 | <b>5.58</b>  | <b>18</b>  | <b>-63</b> | <b>-54</b> | <b>Cerebelum_8_R</b>        |
| 14 | <b>5.58</b>  | <b>-33</b> | <b>-90</b> | <b>6</b>   | <b>Occipital_Mid_L</b>      |
|    | 5.23         | -27        | -93        | 12         | Occipital_Mid_L             |
| 9  | <b>5.34</b>  | <b>60</b>  | <b>-18</b> | <b>0</b>   | <b>Temporal_Sup_R</b>       |
| 22 | <b>5.27</b>  | <b>-51</b> | <b>27</b>  | <b>-3</b>  | <b>Frontal_Inf_Tri_L</b>    |
| 7  | <b>5.22</b>  | <b>48</b>  | <b>-63</b> | <b>-30</b> | <b>Cerebelum_Crus1_R</b>    |
|    | 4.68         | 36         | -66        | -24        | Cerebelum_6_R               |
| 20 | <b>4.99</b>  | <b>24</b>  | <b>-96</b> | <b>9</b>   | <b>Occipital_Sup_R</b>      |
|    | 4.97         | 9          | -90        | 9          | Calcarine_R                 |
|    | 4.79         | 15         | -99        | 9          | Cuneus_R                    |
| 22 | <b>4.92</b>  | <b>57</b>  | <b>6</b>   | <b>42</b>  | <b>Precentral_R</b>         |
| 24 | <b>4.22*</b> | <b>66</b>  | <b>-33</b> | <b>9</b>   | <b>Temporal_Sup_R</b>       |
| 45 | <b>4.04*</b> | <b>-48</b> | <b>-78</b> | <b>-15</b> | <b>Occipital_Inf_L</b>      |
| 16 | <b>3.99*</b> | <b>39</b>  | <b>-12</b> | <b>-39</b> | <b>Fusiform_R</b>           |

**Table S26.** Activation differences between P2 and HC during GE (generation with implicit encoding) after surgery. For each peak, the number of voxels in the cluster (k), T value, x, y, z coordinates (in mm) and region label (AAL atlas, Tzourio-Mazoyer et al., 2002) are presented. All activations were obtained at  $T > 3.61$  ( $p < 0.001$ , uncorrected). Regions in bold represent cluster peaks.

| Contrast          | k                          | T           | x          | y          | z          | AAL                         |
|-------------------|----------------------------|-------------|------------|------------|------------|-----------------------------|
| <b>HC &gt; P2</b> | <b>49</b>                  | <b>6.60</b> | <b>-18</b> | <b>-51</b> | <b>36</b>  | <b>Precuneus_L</b>          |
|                   |                            | 4.66        | -9         | -57        | 18         | Precuneus_L                 |
|                   | <b>34</b>                  | <b>5.42</b> | <b>-15</b> | <b>18</b>  | <b>-6</b>  | <b>Putamen_L</b>            |
|                   | <b>15</b>                  | <b>5.40</b> | <b>9</b>   | <b>-42</b> | <b>12</b>  | <b>Cingulate_Post_R</b>     |
|                   | <b>38</b>                  | <b>5.10</b> | <b>-24</b> | <b>-69</b> | <b>15</b>  | <b>Calcarine_L</b>          |
|                   |                            | 4.73        | -9         | -72        | 18         | Calcarine_L                 |
|                   | <b>20</b>                  | <b>5.01</b> | <b>-15</b> | <b>-75</b> | <b>30</b>  | <b>Cuneus_L</b>             |
|                   | <b>4</b>                   | <b>4.25</b> | <b>54</b>  | <b>-18</b> | <b>-12</b> | <b>Temporal_Mid_R</b>       |
|                   | <b>6</b>                   | <b>4.21</b> | <b>3</b>   | <b>-39</b> | <b>54</b>  | <b>Precuneus_R</b>          |
|                   | <b>7</b>                   | <b>4.14</b> | <b>-6</b>  | <b>57</b>  | <b>3</b>   | <b>Frontal_Sup_Medial_L</b> |
| <b>P2 &gt; HC</b> | No suprathreshold clusters |             |            |            |            |                             |

**Table S27.** Activated regions for the contrast RECO (recognition) vs. baseline in P2 before surgery. For each peak, the number of voxels in the cluster (k), T value, x, y, z coordinates (in mm) and region label (AAL atlas, Tzourio-Mazoyer et al., 2002) are presented. Activations were obtained at  $T > 4.64$  ( $p < 0.05$ , FWE). T values marked with \* were obtained at  $T > 3.1$  ( $p < 0.001$ , uncorrected). Regions in bold represent cluster peaks.

| Contrast | k | T | x | y | z | AAL |
|----------|---|---|---|---|---|-----|
|----------|---|---|---|---|---|-----|

|                                  |              |             |            |            |                          |                             |
|----------------------------------|--------------|-------------|------------|------------|--------------------------|-----------------------------|
| <b>RECO<br/>vs.<br/>baseline</b> | <b>1117</b>  | <b>9.61</b> | <b>36</b>  | <b>-72</b> | <b>-9</b>                | <b>Occipital_Inf_R</b>      |
|                                  |              | 9.02        | 27         | -87        | 9                        | Occipital_Mid_R             |
|                                  |              | 8.39        | 27         | -60        | -15                      | Fusiform_R                  |
|                                  |              | 7.18        | 45         | -57        | -9                       | Temporal_Inf_R              |
|                                  |              | 4.74        | 45         | -54        | -3                       | Temporal_Mid_R              |
|                                  | <b>901</b>   | <b>8.94</b> | <b>-39</b> | <b>-72</b> | <b>-12</b>               | <b>Occipital_Inf_L</b>      |
|                                  |              | 8.92        | -39        | -60        | -15                      | Fusiform_L                  |
|                                  |              | 8.73        | -30        | -87        | 9                        | Occipital_Mid_L             |
|                                  |              | 6.33        | -45        | -63        | -6                       | Temporal_Inf_L              |
|                                  |              | 4.69        | -45        | -54        | -3                       | Temporal_Mid_L              |
|                                  | <b>83</b>    | <b>7.51</b> | <b>45</b>  | <b>39</b>  | <b>3</b>                 | <b>Frontal_Inf_Tri_R</b>    |
|                                  |              | 5.91        | 39         | 42         | 6                        | Frontal_Mid_2_R             |
|                                  |              | 4.41        | 36         | 27         | -6                       | Frontal_Inf_Orb_2_R         |
|                                  | <b>194</b>   | <b>7.32</b> | <b>-36</b> | <b>-21</b> | <b>54</b>                | <b>Precentral_L</b>         |
|                                  |              | 5.76        | -54        | -18        | 39                       | Postcentral_L               |
|                                  | <b>98</b>    | <b>7.22</b> | <b>-27</b> | <b>-69</b> | <b>30</b>                | <b>Occipital_Mid_L</b>      |
|                                  |              | 5.94        | -33        | -66        | 51                       | Parietal_Sup_L              |
|                                  | <b>37</b>    | <b>7.00</b> | <b>33</b>  | <b>-63</b> | <b>54</b>                | <b>Parietal_Sup_R</b>       |
|                                  | <b>175</b>   | <b>6.79</b> | <b>9</b>   | <b>21</b>  | <b>42</b>                | <b>Frontal_Sup_Medial_R</b> |
|                                  |              | 6.45        | 6          | 3          | 60                       | Supp_Motor_Area_R           |
|                                  |              | 6.31        | -6         | 6          | 54                       | Supp_Motor_Area_L           |
|                                  | <b>119</b>   | <b>6.65</b> | <b>-36</b> | <b>15</b>  | <b>27</b>                | <b>Frontal_Inf_Tri_L</b>    |
|                                  |              | 5.21        | -36        | 6          | 24                       | Frontal_Inf_Oper_L          |
|                                  | <b>53</b>    | <b>6.42</b> | <b>39</b>  | <b>24</b>  | <b>21</b>                | <b>Frontal_Mid_2_R</b>      |
|                                  |              | 5.60        | 54         | 3          | 33                       | Precentral_R                |
|                                  |              | 4.73        | 39         | 9          | 27                       | Frontal_Inf_Oper_R          |
|                                  | <b>34</b>    | <b>6.20</b> | <b>36</b>  | <b>24</b>  | <b>-3</b>                | <b>Insula_R</b>             |
|                                  | <b>110</b>   | <b>5.88</b> | <b>-45</b> | <b>45</b>  | <b>18</b>                | <b>Frontal_Mid_2_L</b>      |
|                                  |              | 5.85        | -39        | 33         | 6                        | Frontal_Inf_Tri_L           |
|                                  | <b>15</b>    | <b>5.65</b> | <b>-57</b> | <b>0</b>   | <b>39</b>                | <b>Precentral_L</b>         |
|                                  | <b>12</b>    | <b>5.60</b> | <b>54</b>  | <b>3</b>   | <b>33</b>                | <b>Precentral_R</b>         |
|                                  | <b>8</b>     | <b>5.23</b> | <b>-51</b> | <b>-18</b> | <b>21</b>                | <b>Postcentral_L</b>        |
|                                  |              | 4.83        | -60        | -15        | 21                       | Postcentral_L               |
| <b>9</b>                         | <b>5.01</b>  | <b>-33</b>  | <b>21</b>  | <b>-3</b>  | <b>Insula_L</b>          |                             |
| <b>24</b>                        | <b>4.76</b>  | <b>-24</b>  | <b>33</b>  | <b>-15</b> | <b>OFCpost_L</b>         |                             |
|                                  | 4.27*        | -24         | 33         | -12        | Frontal_Inf_Orb_2_L      |                             |
| <b>33</b>                        | <b>4.32*</b> | <b>-18</b>  | <b>-63</b> | <b>-54</b> | <b>Cerebelum_8_L</b>     |                             |
| <b>13</b>                        | <b>4.01*</b> | <b>42</b>   | <b>-18</b> | <b>63</b>  | <b>Precentral_R</b>      |                             |
| <b>6</b>                         | <b>4.01*</b> | <b>69</b>   | <b>-33</b> | <b>18</b>  | <b>Temporal_Sup_R</b>    |                             |
| <b>10</b>                        | <b>3.69*</b> | <b>21</b>   | <b>42</b>  | <b>-12</b> | <b>OFCant_R</b>          |                             |
| <b>5</b>                         | <b>3.45*</b> | <b>39</b>   | <b>39</b>  | <b>27</b>  | <b>Frontal_Mid_2_R</b>   |                             |
| <b>5</b>                         | <b>3.44*</b> | <b>9</b>    | <b>-75</b> | <b>-36</b> | <b>Cerebelum_Crus2_R</b> |                             |
| <b>11</b>                        | <b>3.42*</b> | <b>-6</b>   | <b>-78</b> | <b>-33</b> | <b>Cerebelum_Crus2_L</b> |                             |
| <b>5</b>                         | <b>3.22*</b> | <b>18</b>   | <b>-3</b>  | <b>-15</b> | <b>Hippocampus_R</b>     |                             |

**Table S28.** Activation differences between P2 and HC during RECO (recognition) before surgery. For each peak, the number of voxels in the cluster (k), T value, x, y, z coordinates (in mm) and region label (AAL atlas, Tzourio-Mazoyer et al., 2002) are presented. All activations were obtained at  $T > 3.61$  ( $p < 0.001$ , uncorrected). Regions in bold represent cluster peaks.

| Contrast          | k           | T           | x          | y          | z                | AAL                         |
|-------------------|-------------|-------------|------------|------------|------------------|-----------------------------|
| <b>HC &gt; P2</b> | <b>19</b>   | <b>4.83</b> | <b>-6</b>  | <b>57</b>  | <b>6</b>         | <b>Frontal_Sup_Medial_L</b> |
|                   |             | 3.95        | -9         | 48         | 6                | Frontal_Sup_Medial_L        |
|                   | <b>8</b>    | <b>4.83</b> | <b>-18</b> | <b>-54</b> | <b>6</b>         | <b>Calcarine_L</b>          |
|                   | <b>46</b>   | <b>4.74</b> | <b>6</b>   | <b>-60</b> | <b>18</b>        | <b>Calcarine_R</b>          |
|                   |             | 4.17        | -9         | -63        | 12               | Calcarine_L                 |
|                   | <b>7</b>    | <b>4.48</b> | <b>-21</b> | <b>-36</b> | <b>-3</b>        | <b>Hippocampus_L</b>        |
|                   | <b>7</b>    | <b>4.35</b> | <b>-30</b> | <b>-21</b> | <b>-18</b>       | <b>Hippocampus_L</b>        |
|                   | <b>5</b>    | <b>4.29</b> | <b>-18</b> | <b>33</b>  | <b>45</b>        | <b>Frontal_Sup_2_L</b>      |
| <b>6</b>          | <b>4.12</b> | <b>9</b>    | <b>-60</b> | <b>-3</b>  | <b>Lingual_R</b> |                             |
| <b>P2 &gt; HC</b> | <b>41</b>   | <b>5.71</b> | <b>39</b>  | <b>39</b>  | <b>3</b>         | <b>Frontal_Mid_2_R</b>      |
|                   | <b>5</b>    | <b>4.61</b> | <b>-36</b> | <b>42</b>  | <b>24</b>        | <b>Frontal_Mid_2_L</b>      |
|                   | <b>5</b>    | <b>4.50</b> | <b>-9</b>  | <b>12</b>  | <b>-6</b>        | <b>Caudate_L</b>            |
|                   | <b>7</b>    | <b>4.29</b> | <b>-33</b> | <b>33</b>  | <b>9</b>         | <b>Frontal_Inf_Tri_L</b>    |
|                   | <b>5</b>    | <b>4.14</b> | <b>-45</b> | <b>42</b>  | <b>12</b>        | <b>Frontal_Inf_Tri_L</b>    |

**Table S29.** Activated regions for the contrast RECO (recognition) vs. baseline in P2 after surgery. For each peak, the number of voxels in the cluster (k), T value, x, y, z coordinates (in mm) and region label (AAL atlas, Tzourio-Mazoyer et al., 2002) are presented. Activations were obtained at  $T > 4.65$  ( $p < 0.05$ , FWE). T values marked with \* were obtained at  $T > 3.1$  ( $p < 0.001$ , uncorrected). Regions in bold represent cluster peaks.

| Contrast                 | k           | T           | x          | y          | z                   | AAL                      |
|--------------------------|-------------|-------------|------------|------------|---------------------|--------------------------|
| <b>RECO vs. baseline</b> | <b>1263</b> | <b>9.73</b> | <b>39</b>  | <b>-69</b> | <b>-12</b>          | <b>Occipital_Inf_R</b>   |
|                          |             | 9.60        | 21         | -84        | -12                 | Lingual_R                |
|                          |             | 9.36        | 36         | -90        | -9                  | Occipital_Inf_R          |
|                          |             | 8.43        | 42         | -63        | -9                  | Temporal_Inf_R           |
|                          | <b>960</b>  | 3.83        | 36         | -27        | -6                  | Hippocampus_R            |
|                          |             | <b>9.48</b> | <b>-36</b> | <b>-69</b> | <b>-15</b>          | <b>Fusiform_L</b>        |
|                          |             | 7.49        | -51        | -66        | -12                 | Occipital_Inf_L          |
|                          | <b>454</b>  | 7.44        | -39        | -81        | -6                  | Occipital_Inf_L          |
|                          |             | <b>7.75</b> | <b>-42</b> | <b>-15</b> | <b>54</b>           | <b>Precentral_L</b>      |
|                          |             | 6.89        | -54        | -15        | 39                  | Postcentral_L            |
|                          |             | 4.91        | -60        | -21        | 9                   | Temporal_Sup_L           |
|                          | <b>62</b>   | 3.64*       | -60        | -24        | 15                  | SupraMarginal_L          |
|                          |             | <b>7.20</b> | <b>45</b>  | <b>42</b>  | <b>3</b>            | <b>Front_Mid_2_R</b>     |
|                          | <b>99</b>   | 4.02*       | 36         | 51         | 9                   | Frontal_Sup_2_R          |
|                          |             | <b>6.08</b> | <b>18</b>  | <b>-63</b> | <b>-54</b>          | <b>Cerebellum_8_R</b>    |
|                          | <b>40</b>   | 5.29        | 0          | -66        | -36                 | Vermis_8                 |
|                          |             | <b>5.82</b> | <b>0</b>   | <b>0</b>   | <b>66</b>           | <b>Supp_Motor_Area_L</b> |
| 4.88                     |             | -9          | -9         | 72         | Supp_Motor_Area_L   |                          |
| <b>15</b>                | <b>5.76</b> | <b>-63</b>  | <b>3</b>   | <b>27</b>  | <b>Precentral_L</b> |                          |

|           |              |            |            |            |                           |
|-----------|--------------|------------|------------|------------|---------------------------|
| <b>48</b> | <b>5.66</b>  | <b>57</b>  | <b>0</b>   | <b>39</b>  | <b>Precentral_R</b>       |
|           | 5.56         | 60         | -12        | 39         | Postcentral_R             |
|           | 4.22*        | 63         | -30        | 18         | Temporal_Sup_R            |
| <b>18</b> | <b>5.54</b>  | <b>60</b>  | <b>-15</b> | <b>21</b>  | <b>Postcentral_R</b>      |
|           | 5.43         | 63         | -24        | 21         | SupraMarginal_R           |
| <b>16</b> | <b>5.50</b>  | <b>-39</b> | <b>33</b>  | <b>9</b>   | <b>Front_Inf_Tri_L</b>    |
| <b>50</b> | <b>5.38</b>  | <b>0</b>   | <b>0</b>   | <b>51</b>  | <b>Supp_Motor_Area_L</b>  |
|           | 5.16         | 3          | 18         | 42         | Frontal_Sup_Medial_L      |
| <b>9</b>  | <b>5.22</b>  | <b>-6</b>  | <b>-9</b>  | <b>54</b>  | <b>Supp_Motor_Area_L</b>  |
| <b>85</b> | <b>4.79</b>  | <b>36</b>  | <b>-30</b> | <b>39</b>  | <b>Postcentral_R</b>      |
|           | 3.54*        | 30         | -45        | 42         | Angular_R                 |
|           | 3.28*        | 42         | -42        | 48         | Parietal_Inf_R            |
| <b>57</b> | <b>4.70</b>  | <b>24</b>  | <b>36</b>  | <b>-15</b> | <b>OFCant_R</b>           |
| <b>58</b> | <b>4.53*</b> | <b>39</b>  | <b>24</b>  | <b>21</b>  | <b>Frontal_Mid_2_R</b>    |
| <b>24</b> | <b>4.35*</b> | <b>18</b>  | <b>66</b>  | <b>3</b>   | <b>Frontal_Sup_2_R</b>    |
| <b>61</b> | <b>4.24*</b> | <b>-6</b>  | <b>-24</b> | <b>9</b>   | <b>Thalamus_L</b>         |
| <b>46</b> | <b>4.19*</b> | <b>30</b>  | <b>15</b>  | <b>63</b>  | <b>Frontal_Sup_2_R</b>    |
| <b>36</b> | <b>4.02*</b> | <b>-33</b> | <b>21</b>  | <b>-9</b>  | <b>Insula_L</b>           |
| <b>35</b> | <b>3.99*</b> | <b>-30</b> | <b>-69</b> | <b>48</b>  | <b>Parietal_Sup_2_L</b>   |
| <b>29</b> | <b>3.99*</b> | <b>33</b>  | <b>-66</b> | <b>54</b>  | <b>Parietal_Sup_R</b>     |
| <b>13</b> | <b>3.97*</b> | <b>-24</b> | <b>33</b>  | <b>-15</b> | <b>OFCpost_L</b>          |
| <b>23</b> | <b>3.93*</b> | <b>57</b>  | <b>21</b>  | <b>33</b>  | <b>Frontal_Inf_Oper_R</b> |
| <b>8</b>  | <b>3.93*</b> | <b>45</b>  | <b>-3</b>  | <b>-33</b> | <b>Temporal_Inf_R</b>     |
| <b>12</b> | <b>3.92*</b> | <b>3</b>   | <b>54</b>  | <b>-9</b>  | <b>Frontal_Med_Orb_R</b>  |
| <b>13</b> | <b>3.71*</b> | <b>-15</b> | <b>51</b>  | <b>-9</b>  | <b>Frontal_Sup_2_L</b>    |
| <b>50</b> | <b>3.65*</b> | <b>15</b>  | <b>-18</b> | <b>15</b>  | <b>Thalamus_R</b>         |
|           | 3.53*        | 24         | -18        | 24         | Caudate_R                 |
| <b>5</b>  | <b>3.64*</b> | <b>-18</b> | <b>63</b>  | <b>6</b>   | <b>Frontal_Sup_2_L</b>    |
| <b>6</b>  | <b>3.60*</b> | <b>45</b>  | <b>-33</b> | <b>21</b>  | <b>Rolandic_Oper_R</b>    |
| <b>9</b>  | <b>3.54*</b> | <b>-6</b>  | <b>42</b>  | <b>-9</b>  | <b>Frontal_Med_Orb_L</b>  |
| <b>5</b>  | <b>3.50*</b> | <b>-18</b> | <b>-3</b>  | <b>18</b>  | <b>Caudate_L</b>          |
| <b>8</b>  | <b>3.48*</b> | <b>-36</b> | <b>-60</b> | <b>36</b>  | <b>Angular_L</b>          |
| <b>6</b>  | <b>3.42*</b> | <b>0</b>   | <b>-36</b> | <b>27</b>  | <b>Cingulate_Post_L</b>   |

**Table S30.** Activation differences between P2 and HC during RECO (recognition) after surgery. For each peak, the number of voxels in the cluster (k), T value, x, y, z coordinates (in mm) and region label (AAL atlas, Tzourio-Mazoyer et al., 2002) are presented. All activations were obtained at  $T > 3.61$  ( $p < 0.001$ , uncorrected). Regions in bold represent cluster peaks.

| Contrast          | k                          | T           | x          | y          | z         | AAL                         |
|-------------------|----------------------------|-------------|------------|------------|-----------|-----------------------------|
| <b>HC &gt; P2</b> | No suprathreshold clusters |             |            |            |           |                             |
| <b>P2 &gt; HC</b> | <b>17</b>                  | <b>5.65</b> | <b>-60</b> | <b>-6</b>  | <b>33</b> | <b>Precentral_L</b>         |
|                   | <b>5</b>                   | <b>4.70</b> | <b>-6</b>  | <b>33</b>  | <b>48</b> | <b>Frontal_Sup_Medial_L</b> |
|                   | <b>5</b>                   | <b>4.34</b> | <b>-9</b>  | <b>-30</b> | <b>9</b>  | <b>Thalamus_L</b>           |
|                   | <b>8</b>                   | <b>4.10</b> | <b>42</b>  | <b>42</b>  | <b>3</b>  | <b>Frontal_Mid_2_R</b>      |

**Table S31.** Activated regions for the contrast RA (sentence recall) vs. baseline in P2 before surgery. For each peak, the number of voxels in the cluster (k), T value, x, y, z coordinates (in mm) and region label (AAL atlas, Tzourio-Mazoyer et al., 2002) are presented. Activations were obtained at  $T > 4.64$  ( $p < 0.05$ , FWE). T values marked with \* were obtained at  $T > 3.1$  ( $p < 0.001$ , uncorrected). Regions in bold represent cluster peaks.

| Contrast           | k          | T            | x          | y           | z          | AAL                         |
|--------------------|------------|--------------|------------|-------------|------------|-----------------------------|
| RA<br>vs. baseline | <b>664</b> | <b>15.11</b> | <b>-12</b> | <b>-102</b> | <b>6</b>   | <b>Occipital_Mid_L</b>      |
|                    |            | 11.48        | -30        | -90         | 9          | Occipital_Mid_L             |
|                    |            | 11.26        | -24        | -96         | -12        | Occipital_Inf_L             |
|                    | <b>525</b> | <b>11.36</b> | <b>15</b>  | <b>-96</b>  | <b>-6</b>  | <b>Calcarine_R</b>          |
|                    |            | 11.32        | 24         | -87         | -9         | Lingual_R                   |
|                    | <b>204</b> | <b>9.10</b>  | <b>-63</b> | <b>-21</b>  | <b>9</b>   | <b>Temporal_Sup_L</b>       |
|                    |            | 7.31         | -66        | -39         | 6          | Temporal_Mid_L              |
|                    | <b>168</b> | <b>7.86</b>  | <b>60</b>  | <b>-21</b>  | <b>0</b>   | <b>Temporal_Sup_R</b>       |
|                    |            | 6.40         | 63         | -33         | 3          | Temporal_Sup_R              |
|                    |            | 6.31         | 63         | -6          | -9         | Temporal_Sup_R              |
|                    | <b>88</b>  | <b>7.66</b>  | <b>30</b>  | <b>-66</b>  | <b>60</b>  | <b>Parietal_Sup_R</b>       |
|                    | <b>60</b>  | <b>6.93</b>  | <b>-36</b> | <b>21</b>   | <b>-9</b>  | <b>Frontal_Inf_Orb_2_L</b>  |
|                    | <b>91</b>  | <b>6.60</b>  | <b>3</b>   | <b>6</b>    | <b>63</b>  | <b>Supp_Motor_Area_R</b>    |
|                    |            | 5.63         | -12        | 9           | 69         | Supp_Motor_Area_L           |
|                    | <b>90</b>  | <b>6.58</b>  | <b>-48</b> | <b>3</b>    | <b>48</b>  | <b>Precentral_L</b>         |
|                    |            | 5.42         | -51        | 12          | 30         | Precentral_L                |
|                    |            | 5.40         | -36        | 3           | 60         | Front_Mid_2_L               |
|                    | <b>10</b>  | <b>5.90</b>  | <b>-18</b> | <b>63</b>   | <b>3</b>   | <b>Front_Sup_2_L</b>        |
|                    | <b>119</b> | <b>5.89</b>  | <b>-39</b> | <b>45</b>   | <b>6</b>   | <b>Frontal_Inf_Tri_L</b>    |
|                    |            | 5.15         | -39        | 42          | 24         | Frontal_Mid_2_L             |
|                    |            | 5.31         | -51        | 12          | 6          | Frontal_Inf_Oper_L          |
|                    | <b>20</b>  | <b>5.72</b>  | <b>-48</b> | <b>15</b>   | <b>6</b>   | <b>Frontal_Inf_Tri_L</b>    |
|                    | <b>18</b>  | <b>5.34</b>  | <b>-18</b> | <b>-72</b>  | <b>57</b>  | <b>Parietal_Sup_L</b>       |
|                    |            | 3.90         | -39        | -57         | 42         | Angular_L                   |
|                    | <b>15</b>  | <b>5.23</b>  | <b>6</b>   | <b>21</b>   | <b>42</b>  | <b>Frontal_Sup_Medial_R</b> |
|                    |            | 4.91         | -3         | 18          | 42         | Frontal_Sup_Medial_L        |
|                    | <b>7</b>   | <b>5.21</b>  | <b>-30</b> | <b>9</b>    | <b>66</b>  | <b>Frontal_Mid_2_L</b>      |
|                    | <b>22</b>  | <b>5.17</b>  | <b>-33</b> | <b>30</b>   | <b>18</b>  | <b>Frontal_Inf_Tri_L</b>    |
|                    |            | 5.12         | -33        | 21          | 21         | Frontal_Inf_Tri_L           |
|                    | <b>7</b>   | <b>5.16</b>  | <b>36</b>  | <b>24</b>   | <b>0</b>   | <b>Insula_R</b>             |
|                    | <b>55</b>  | <b>4.97</b>  | <b>57</b>  | <b>3</b>    | <b>42</b>  | <b>Precentral_R</b>         |
|                    | <b>29</b>  | <b>4.78</b>  | <b>39</b>  | <b>24</b>   | <b>21</b>  | <b>Frontal_Mid_2_R</b>      |
|                    | <b>37</b>  | <b>4.58</b>  | <b>-3</b>  | <b>48</b>   | <b>48</b>  | <b>Frontal_Sup_Medial_L</b> |
|                    | <b>32</b>  | <b>4.11*</b> | <b>42</b>  | <b>-39</b>  | <b>54</b>  | <b>Parietal_Inf_R</b>       |
|                    | <b>30</b>  | <b>4.06*</b> | <b>45</b>  | <b>-66</b>  | <b>-33</b> | <b>Cerebellum_Crus1_R</b>   |
|                    | <b>8</b>   | <b>4.02*</b> | <b>39</b>  | <b>-15</b>  | <b>-39</b> | <b>Fusiform_R</b>           |
|                    | <b>27</b>  | <b>3.92*</b> | <b>63</b>  | <b>-24</b>  | <b>45</b>  | <b>SupraMarginal_R</b>      |
|                    | <b>27</b>  | <b>3.85*</b> | <b>-12</b> | <b>-57</b>  | <b>72</b>  | <b>Precuneus_L</b>          |
|                    | <b>11</b>  | <b>3.83*</b> | <b>-21</b> | <b>30</b>   | <b>-21</b> | <b>OFCant_L</b>             |
|                    | <b>16</b>  | <b>3.73*</b> | <b>-9</b>  | <b>48</b>   | <b>-9</b>  | <b>Frontal_Med_Orb_L</b>    |

|    |       |     |     |     |                 |
|----|-------|-----|-----|-----|-----------------|
| 24 | 3.71* | 9   | 12  | 3   | Caudate_R       |
| 10 | 3.67* | 27  | -60 | 33  | Occipital_Sup_R |
| 6  | 3.56* | 45  | -36 | 9   | Temporal_Sup_R  |
| 7  | 3.43* | -15 | -3  | 18  | Caudate_L       |
| 12 | 3.38* | 18  | -48 | -24 | Cerebelum_4_5_R |

**Table S32.** Activation differences between P2 and HC during RA (sentence recall) before surgery. For each peak, the number of voxels in the cluster (k), T value, x, y, z coordinates (in mm) and region label (AAL atlas, Tzourio-Mazoyer et al., 2002) are presented. All activations were obtained at  $T > 3.61$  ( $p < 0.001$ , uncorrected). Regions in bold represent cluster peaks.

| Contrast | k       | T           | x           | y          | z          | AAL                   |
|----------|---------|-------------|-------------|------------|------------|-----------------------|
| HC > P2  | 194     | <b>6.39</b> | <b>-30</b>  | <b>-63</b> | <b>-9</b>  | <b>Fusiform_L</b>     |
|          |         | 5.85        | -18         | -51        | -9         | Lingual_L             |
|          |         | 5.51        | 6           | -60        | -3         | Lingual_R             |
|          | 101     | <b>6.20</b> | <b>15</b>   | <b>-72</b> | <b>21</b>  | <b>Cuneus_R</b>       |
|          |         | 5.19        | 12          | -75        | 9          | Calcarine_R           |
|          | 62      | <b>5.70</b> | <b>-15</b>  | <b>-84</b> | <b>-3</b>  | <b>Lingual_L</b>      |
|          |         | 4.68        | -6          | -84        | 15         | Cuneus_L              |
|          |         | 4.55        | -15         | -81        | 18         | Occipital_Sup_L       |
|          | 10      | <b>4.42</b> | <b>-12</b>  | <b>-69</b> | <b>15</b>  | <b>Calcarine_L</b>    |
|          | 5       | <b>4.17</b> | <b>-24</b>  | <b>-69</b> | <b>15</b>  | <b>Calcarine_L</b>    |
|          | 8       | <b>3.98</b> | <b>24</b>   | <b>-51</b> | <b>6</b>   | <b>Calcarine_R</b>    |
|          | P2 > HC | 13          | <b>5.56</b> | <b>-39</b> | <b>-84</b> | <b>-9</b>             |
| 4.67     |         |             | -33         | -90        | 0          | Occipital_Mid_L       |
| 14       |         | <b>5.37</b> | <b>27</b>   | <b>-63</b> | <b>60</b>  | <b>Parietal_Sup_R</b> |
| 16       |         | <b>5.21</b> | <b>-36</b>  | <b>-72</b> | <b>-18</b> | <b>Fusiform_L</b>     |
| 7        |         | <b>4.39</b> | <b>-12</b>  | <b>-96</b> | <b>21</b>  | <b>Cuneus_L</b>       |
| 23       |         | <b>4.16</b> | <b>21</b>   | <b>-96</b> | <b>-6</b>  | <b>Calcarine_R</b>    |
|          |         | 4.13        | 21          | -87        | -12        | Lingual_R             |

**Table S33.** Activated regions for the contrast RA (sentence recall) vs. baseline in P2 after surgery. For each peak, the number of voxels in the cluster (k), T value, x, y, z coordinates (in mm) and region label (AAL atlas, Tzourio-Mazoyer et al., 2002) are presented. Activations were obtained at  $T > 4.65$  ( $p < 0.05$ , FWE). T values marked with \* were obtained at  $T > 3.1$  ( $p < 0.001$ , uncorrected). Regions in bold represent cluster peaks.

| Contrast        | k            | T           | x          | y          | z                   | AAL                   |
|-----------------|--------------|-------------|------------|------------|---------------------|-----------------------|
| RA vs. baseline | 92           | <b>7.37</b> | <b>60</b>  | <b>-18</b> | <b>-3</b>           | <b>Temporal_Sup_R</b> |
|                 |              | 6.4         | 66         | -12        | 6                   | Temporal_Sup_R        |
|                 |              | 3.7*        | 60         | -18        | 12                  | Rolandic_Oper_R       |
|                 |              | 3.5*        | 60         | -27        | -3                  | Temporal_Mid_R        |
|                 | 37           | 3.28*       | 57         | 6          | -9                  | Temporal_Pole_Sup_R   |
|                 |              | <b>6.88</b> | <b>-60</b> | <b>-18</b> | <b>6</b>            | <b>Temporal_Sup_L</b> |
|                 | 6            | 4.79        | -57        | -18        | 0                   | Temporal_Mid_L        |
| 6               | <b>3.52*</b> | <b>57</b>   | <b>0</b>   | <b>45</b>  | <b>Precentral_L</b> |                       |

**Table S34.** Activation differences between P2 and HC during RA (sentence recall) after surgery. For each peak, the number of voxels in the cluster (k), T value, x, y, z coordinates (in mm) and region label (AAL atlas, Tzourio-Mazoyer et al., 2002) are presented. All activations were obtained at  $T > 3.61$  ( $p < 0.001$ , uncorrected). Regions in bold represent cluster peaks.

| <b>Contrast</b>   | <b>k</b>                   | <b>T</b>    | <b>x</b>   | <b>y</b>   | <b>z</b>         | <b>AAL</b>                  |
|-------------------|----------------------------|-------------|------------|------------|------------------|-----------------------------|
| <b>HC &gt; P2</b> | <b>54</b>                  | <b>6.56</b> | <b>51</b>  | <b>18</b>  | <b>36</b>        | <b>Frontal_Inf_Oper_R</b>   |
|                   |                            | 3.95        | 39         | 18         | 24               | Frontal_Inf_Tri_R           |
|                   | <b>76</b>                  | <b>6.56</b> | <b>-39</b> | <b>-51</b> | <b>48</b>        | <b>Parietal_Inf_L</b>       |
|                   |                            | 5.68        | -45        | -39        | 51               | Parietal_Inf_L              |
|                   | <b>72</b>                  | <b>6.22</b> | <b>-48</b> | <b>9</b>   | <b>24</b>        | <b>Frontal_Inf_Oper_L</b>   |
|                   | <b>46</b>                  | <b>5.57</b> | <b>-45</b> | <b>39</b>  | <b>12</b>        | <b>Frontal_Inf_Tri_L</b>    |
|                   | <b>25</b>                  | <b>5.39</b> | <b>42</b>  | <b>-63</b> | <b>51</b>        | <b>Angular_R</b>            |
|                   |                            | 3.87        | 39         | -57        | 42               | Parietal_Inf_R              |
|                   | <b>58</b>                  | <b>5.35</b> | <b>-9</b>  | <b>33</b>  | <b>45</b>        | <b>Frontal_Sup_medial_L</b> |
|                   |                            | 5.06        | 9          | 33         | 48               | Frontal_Sup_medial_R        |
|                   | <b>51</b>                  | <b>5.25</b> | <b>9</b>   | <b>-75</b> | <b>-27</b>       | <b>Cerebellum_Crus1_R</b>   |
|                   |                            | 5.11        | 9          | -78        | -36              | Cerebellum_Crus2_R          |
|                   |                            | 4.33        | -3         | -75        | -30              | Cerebellum_Crus2_L          |
|                   | <b>9</b>                   | <b>4.47</b> | <b>51</b>  | <b>39</b>  | <b>15</b>        | <b>Frontal_Inf_Tri_R</b>    |
|                   | <b>7</b>                   | <b>4.40</b> | <b>30</b>  | <b>-78</b> | <b>45</b>        | <b>Occipital_Sup_R</b>      |
|                   | <b>11</b>                  | <b>4.39</b> | <b>-24</b> | <b>-69</b> | <b>48</b>        | <b>Parietal_Sup_L</b>       |
| <b>8</b>          | <b>4.34</b>                | <b>-15</b>  | <b>-87</b> | <b>-3</b>  | <b>Lingual_L</b> |                             |
| <b>P2 &gt; HC</b> | No suprathreshold clusters |             |            |            |                  |                             |
